1        **TFIIIF $\alpha$  interacts with the Topoisomerase VI complex and selectively controls the**  
2        **expression of genes encoding PPR proteins involved in organellar RNA editing in**  
3        **Arabidopsis.**

4  
5    Laura Dimnet<sup>a</sup>, Cécile Vriet<sup>a,b</sup>, Dorine Achard<sup>a</sup>, Cécile Lecampion<sup>a</sup>, Christian Breuer<sup>c</sup>,  
6    Ludivine Soubigou-Taconnat<sup>d,e</sup>, Keiko Sugimoto<sup>h</sup>, Etienne Delannoy<sup>d,e</sup> and Christophe Laloi  
7    <sup>a,\*</sup>.

8  
9    <sup>a</sup>Aix Marseille Univ, CEA, CNRS, BIAM, Saint Paul-Lez-Durance, France

10   <sup>b</sup>UMR CNRS 7267 EBI, 86073 Poitiers Cedex 9, France

11   <sup>c</sup>RIKEN Center for Sustainable Resource Science, Yokohama, 230-0045, Japan

12   <sup>d</sup>Institute of Plant Sciences Paris-Saclay (IPS2), CNRS, INRA, Université Paris-Sud,  
13   Université d'Evry, Université Paris-Saclay, Bâtiment 630, Plateau de Moulon, 91192 Gif sur  
14   Yvette, France

15   <sup>e</sup>Institute of Plant Sciences Paris-Saclay (IPS2), CNRS, INRA Université Paris-Diderot,  
16   Sorbonne Paris-Cité, Bâtiment 630, Plateau de Moulon, 91192 Gif sur Yvette, France

17

18   Corresponding author : [christophe.laloi@univ-amu.fr](mailto:christophe.laloi@univ-amu.fr)

19

20   Short title: Coordination of PLS-PPR expression by TFIIIF $\alpha$

21

22   The author responsible for distribution of materials integral to the findings presented in this  
23   article in accordance with the policy described in the Instructions for Authors

24   (www.plantcell.org) is: Christophe Laloi ([christophe.laloi@univ-amu.fr](mailto:christophe.laloi@univ-amu.fr)).

25

26 **ABSTRACT**

27 Communication between organelles and the nucleus is referred to as anterograde (nucleus to  
28 organelle) and retrograde (organelle to nucleus) signalling. In plants, the pentatricopeptide  
29 repeat (PPR) proteins represent a large family of nuclear-encoded proteins that are required  
30 for post-transcriptional control of chloroplast and mitochondria gene expression, and hence  
31 play a central role in the nuclear anterograde control of organelle genome expression. How  
32 *PPR* gene expression is controlled and regulated by retrograde signals is, however, still  
33 unknown. Here, we report a significant role for the general transcription factor TFIIF  $\alpha$ -  
34 subunit (TFIIF $\alpha$ ) in controlling *PPR* gene expression in Arabidopsis. First, we found that  
35 TFIIF $\alpha$  interacts with the BIN4 subunit of the Topoisomerase VI (Topo VI). Transcriptome  
36 analysis of TFIIF and Topo VI mutant lines then revealed that many PLS-type PPR genes  
37 involved in RNA editing are reciprocally controlled by TFIIF and Topo VI. The  
38 misexpression of *CLB19* and *DYWI* genes in two allelic *tfl1fa* mutants was associated with  
39 editing impairments in their plastid target RNAs *rpoA* and *ndhD*, respectively. Interestingly,  
40 we also detected a change in NDH activity in *tfl1fa* plants. We also show that TFIIF $\alpha$  and  
41 Topo VI coordinate the expression of NDH subunits encoded by the nuclear and plastid  
42 genomes. These results reveal the crucial role of the nuclear TFIIF $\alpha$  and Topo VI complexes  
43 in controlling plastid genome expression at multiple levels of regulation, including the  
44 particular regulation of PPR gene expression.

## 45 INTRODUCTION

46 Proteins encoded by plastid and mitochondrial genomes are not sufficient to support the  
47 development and the metabolism of organelles, and most of the proteins they contain are  
48 nuclear-encoded and synthesized in the cytosol before organellar targeting. Consequently,  
49 organellar proteomes from separated genomes require coordinated expression between  
50 cellular compartments to maintain organelle homeostasis (Woodson and Chory, 2008). This  
51 regulation includes both the anterograde (nucleus-to-organelles) and the retrograde (organelle-  
52 to-nucleus) signalling. In a genetic screen designed to identify *Arabidopsis* (*Arabidopsis*  
53 *thaliana*) genes involved in singlet oxygen ( $^1\text{O}_2$ )-mediated retrograde signalling, a mutant  
54 called *constitutive activator of AAA-ATPase 39* (*caa39*) was isolated where  $^1\text{O}_2$ -responsive  
55 genes are constitutively up-regulated under steady-state conditions, and are not further  
56 activated under  $^1\text{O}_2$ -producing conditions (Baruah et al., 2009). This mutant is affected in the  
57 gene encoding the A-subunit of Topoisomerase VI (Topo VI) and reveals the involvement of  
58 Topo VI in  $^1\text{O}_2$  retrograde signalling as well as a putative dual function as a transcriptional  
59 activator and repressor, depending on environmental conditions.

60 Topo VI belongs to the topoisomerase superfamily, a class of enzymes which resolve DNA  
61 topological constraints by relaxing supercoils, knots and catenanes in prokaryotic and  
62 eukaryotic cells. During DNA processes such as transcription, supercoils usually occur on  
63 double-helical structure and if this phenomenon is persistent, it can lead to transcriptional  
64 regulation defects as well as DNA breaks that are damaging for gene expression and cell  
65 viability (Corbett and Berger, 2003). The structure and mechanism of action of Topo VI have  
66 been characterized in Archaea where the complex was originally discovered (Corbett et al.,  
67 2007; Graille et al., 2008). With a heterotetrameric A<sub>2</sub>B<sub>2</sub> structure and ATP-dependent  
68 double-stranded break activity, Topo VI belongs to the type IIB Topoisomerases. The  
69 complex is composed of A-subunits (Topo VIA) involved in DNA binding and cleavage and  
70 B-subunits (Topo VIB) that allow ATP fixation and hydrolysis. In contrast to Archaea, plant  
71 Topo VI possesses two additional subunits, BIN4/MID (AT5G24630, hereafter called BIN4)  
72 and RHL1/HYP7 (AT1G48380, hereafter called RHL1) that interact together and with Topo  
73 VIA (Breuer et al., 2007; Sugimoto-Shirasu et al., 2005; Kirik et al., 2007). The function of  
74 BIN4 and RHL1 in the Topo VI complex remains unclear. However, given that BIN4 and  
75 RHL1 possess sequence similarity to the regulatory C-terminal region of animal Topo  
76 II $\alpha$  (Gadelle et al., 2003) and exhibits stable DNA binding *in vitro*, it has been hypothesized  
77 that BIN4 and RHL1 could help the enzyme to hold the substrate DNA during the

78 decatenation reaction (Sugimoto-Shirasu et al., 2005; Breuer et al., 2007). Topo VI knock-out  
79 mutant plants, whatever the subunit affected, show a similar pleiotropic phenotype: severe  
80 growth inhibition, ploidy decrease, and defective skotomorphogenesis (Yin et al., 2002;  
81 Hartung et al., 2002; Sugimoto-Shirasu et al., 2002, 2005; Schrader et al., 2013; Kirik et al.,  
82 2007; Breuer et al., 2007). Overexpression of rice *OsTOP6A3* and *OsTOP6B* in Arabidopsis  
83 plants confers stress tolerance that coincides with enhanced induction of many stress-  
84 responsive genes (Jain et al., 2006). More recently, we reported that Topo VI is a key  
85 regulatory factor during the activation of ROS-responsive genes (Šimková et al, 2012). Taken  
86 together, these results emphasize the crucial role of Topo VI in plant stress responses.  
87 However, how Topo VI controls the expression of specific genes remains obscure.

88 Here, we reveal that the  $\alpha$ -subunit of the general transcription factor TFIIF (TFIIF $\alpha$ ) interacts  
89 with the BIN4 subunit of the Topo VI complex. RNA-sequencing carried out in two different  
90 *tfl1fa* mutants showed a massive repression of genes encoding pentatricopeptide repeat (PPR)  
91 proteins involved in organellar RNA editing. Remarkably, these *PPR* genes were inversely  
92 affected in the Topo VI mutant *caa39*. In *tfl1fa* mutants, misexpression of two of *PPR* genes,  
93 *CLB19* and *DYWI*, was associated with editing impairments in their target RNAs in the  
94 plastid, *rpoA* and *ndhD*, respectively. Concurrently, mutations in TFIIF $\alpha$  and Topo VI also  
95 affected the expression of NDH subunits encoded by both the nuclear and plastid genomes.  
96 Finally, we detected a change in NDH activity as a likely consequence of these defects in  
97 *tfl1fa* plants.

98

## 99 **RESULTS**

### 100 **BIN4 interacts with the General Transcription Factor RAP74/TFIIF $\alpha$**

101 To determine whether BIN4 may interact with other proteins and hence govern the activity of  
102 the Topo VI complex, we performed a yeast two-hybrid screen for Arabidopsis cDNAs  
103 encoding proteins that can interact directly with BIN4. The screen was performed under two  
104 different stringency conditions (Hybrigenics, Supplemental Table 1). Respectively 36 and 86  
105 putative interactions (positive colonies) were analyzed. A strong interaction was confirmed  
106 with the Topo VI subunit RHL1, for which respectively 8 and 19 clones were identified under  
107 the two stringency conditions, thereby demonstrating the reliability of the screening procedure  
108 (Supplemental Table 1). However, the strongest interactor identified during these screens was

109 not described before and corresponds to the ATRAP74/TFIIF $\alpha$  (AT4G12610, hereafter called  
110 TFIIF $\alpha$ ), for which respectively 8 and 33 clones were identified under the two stringency  
111 conditions (Supplemental Table 1). TFIIF $\alpha$ /RAP74 is the large subunit of the general  
112 transcription factor TFIIF, which is needed for accurate transcription initiation and stimulates  
113 elongation by RNA polymerase II (Pol II) in metazoa. After transcription termination, the  
114 interaction of TFIIF with TFIIF-associated C-terminal domain (CTD) phosphatase 1 (FCP1),  
115 which catalyzes the Ser2 and Ser5 dephosphorylation of Pol II CTD, is essential for Pol II  
116 recycling at new promoters (Lin et al., 2002; Abbott et al., 2005; Kimura et al., 2002;  
117 Archambault et al., 1998; Palancade et al., 2002; Yang et al., 2009; Kumar et al., 2013;  
118 Nguyen et al., 2003; Kamada et al., 2003).

119 We performed an independent yeast two-hybrid assay to further confirm the interaction  
120 between BIN4 and TFIIF $\alpha$  and to determine whether TFIIF $\alpha$  could directly interact with  
121 other components of the plant Topo VI complex. As shown in Figure 1A, TFIIF $\alpha$  strongly  
122 interacted with BIN4, but not directly with other subunits of the Topo VI complex. In order to  
123 confirm the interaction between BIN4 and TFIIF $\alpha$  *in planta*, we performed a bimolecular  
124 fluorescence complementation (BiFC) assay. The N-terminal and the C-terminal parts of the  
125 yellow fluorescent protein (nYFP and cYFP) were fused to TFIIF $\alpha$  and BIN4, and then were  
126 transiently co-expressed in agro-transformed *Nicotiana benthamiana* mesophyll cells. We  
127 also co-expressed the Topo VI A subunit fused with the cyan fluorescent protein (AtTOP6A-  
128 CFP) to visualize the nuclei and localize the interaction of BIN4 and TFIIF $\alpha$ . The BiFC assay  
129 revealed reconstituted YFP fluorescence that was specifically localized in the nucleus with a  
130 speckled-like distribution. This result confirms the interaction between BIN4 and TFIIF $\alpha$   
131 (Figure 1B). Interestingly, the YFP fluorescence pattern was very similar to AtTOP6A-CFP  
132 fluorescence, suggesting that the BIN4-TFIIF $\alpha$  interaction loci co-localise with Topo VI  
133 within the nucleus (Figure 1B).

134

### 135 **Two TFIIF $\alpha$ transcripts are generated from a single-copy gene in Arabidopsis.**

136 The Arabidopsis genome contains one TFIIF $\alpha$  gene (*AtRAP74*, *AT4G12610*) that encodes at  
137 least two transcripts, *TFIIF $\alpha$ .1* (*AT4G12610.1*) and *TFIIF $\alpha$ .2* (*AT4G12610.2*) (Figure 2A,  
138 [www.arabidopsis.org](http://www.arabidopsis.org)). The conserved C-terminal domain of TFIIF $\alpha$ .1, which is required for  
139 the interaction with the two FCP1-type CTD-phosphatase proteins CPL3 and CPL4 (Bang et

140 al., 2006; Li et al., 2014) is encoded by exons 9 and 10. Quite unusually, this CTD-  
141 phosphatase interaction domain is duplicated in the *TFIIFα.2* peptide (encoded by exon 11),  
142 whereas part of the last intron (intron 10) constitutes the 3'UTR of *TFIIFα.1* transcript  
143 (Figure 2A). The presence of a *TFIIFα* isoform with two CTD-phosphatase interaction  
144 domains could be identified only within the *Arabidopsis* genus. Quantitative RT-PCR analysis  
145 with different primer pairs designed to amplify specifically *TFIIFα.1*, *TFIIFα.2* or both  
146 transcripts revealed that *TFIIFα.2* was much less abundant than *TFIIFα.1* (Figure 2B). This  
147 unequal abundance of the two transcripts was further confirmed by inspection of publically  
148 available RNA-seq data ([www.araport.org](http://www.araport.org)).

149

### 150 **TFIIFα mutants exhibit growth defects**

151 TFIIF function has been established from a wealth of experiments mostly performed in  
152 human and yeast, on the one hand, and using a limited number of model TATA box-  
153 containing promoters, on the other hand (Luse, 2012). The role of TFIIF, which is still  
154 incompletely understood and seem to differ in yeast and mammals, was nearly completely  
155 uninvestigated in plants until recently (Babiychuk et al., 2016). In order to describe the role of  
156 *TFIIFα* in *Arabidopsis*, we characterized different *TFIIFα* T-DNA insertion mutants. When  
157 we started this work, only the SAIL\_1171\_F02 line (hereafter named *tfIifα-1*) in the Col-3  
158 ecotype background was available. This line carries a T-DNA in the *TFIIFα* CDS (exon 8).  
159 More recently, T-DNA-sequencing programs have allowed the identification of new *tfIifα*  
160 mutant lines in the Col-0 ecotype (O'Malley et al., 2015). The T-DNA insertion in *tfIifα-2*  
161 (SALKseq\_038203) is localized in exon 10 and interrupts the first CTD-phosphatase  
162 interaction domain, and the T-DNA insertions in *tfIifα-3* (SALKseq\_038203) and *tfIifα-4*  
163 (SALKseq\_095102) are inserted in introns 9 and 10, respectively (Figure 2A).

164

165 In order to determine the impact of these insertions on the *TFIIFα* transcript levels, we  
166 performed RT-PCR and quantitative RT-PCR with several primer pairs distributed along the  
167 *TFIIFα* gene (Figure 2A). This analysis revealed that *tfIifα-1* could not produce any transcript  
168 that would allow the synthesis of a protein containing any CTD-phosphatase interaction  
169 domain (Figures 2C and 2D). Similarly, *tfIifα-2* could barely produce any *TFIIFα* peptide  
170 containing a complete CTD-phosphatase interaction domain (Figures 2D). On the contrary,  
171 *TFIIFα.1* or *TFIIFα.2* native transcripts are still present, although to a lower level, in the  
172 *tfIifα-3* mutant (Figures 2C and 2D). These results suggest that intron 9 splicing was reduced

173 but not completely abolished in *tfIIfa-3* as a consequence of the T-DNA insertion. Finally, the  
174 *tfIIfa-4* mutant was the only one with a T-DNA insertion that would impair only the second,  
175 and not the first, CTD-phosphatase interaction domain (Figure 2D).

176

177 The phenotype of the four *tfIIfa* mutant lines was first assessed under long-day conditions (16  
178 h light / 8 h dark) in soil. Plant growth appeared differentially affected: *tfIIfa-1* was smaller  
179 than wild-type Col-3, as were the *tfIIfa-2* and *tfIIfa-3* mutants compared to wild-type Col-0  
180 (Figure 2E). However, growth inhibition during the vegetative stage was slightly less  
181 pronounced in *tfIIfa-3* than in *tfIIfa-2* and *tfIIfa-1* plants (Figure 2E and Supplemental Figure  
182 1A). The *tfIIfa-4* mutant displayed a wild-type phenotype (Figure 2E and Supplemental  
183 Figure 1A). In all cases, complementation of the various mutant lines with a wild-type copy  
184 of *TFIIFa* restored a wild-type phenotype (Figure 2E), and wild-type, or above wild-type,  
185 gene expression levels (Supplemental Figure 1B). These phenotypes are consistent with the  
186 molecular defects of the different alleles: the degree of impairment of the first CTD-  
187 phosphatase interaction domain correlates with the severity of the phenotype. Collectively,  
188 these results also suggest that the second CTD-phosphatase interaction domain is dispensable  
189 for *TFIIFa* function, in agreement with its general absence in *TFIIFa* orthologues.

190

191 ***TFIIFa* defects mainly affect the expression of PLS-type PPR genes that are inversely**  
192 **affected in the Topo VI mutant *caa39*.**

193 In order to investigate the role of *TFIIFa* in plant gene expression, we performed an RNA-seq  
194 analysis of *tfIIfa-1* and Col-3 wild-type plants. Strikingly, genes coding for pentatricopeptide  
195 repeat (PPR) proteins were strongly enriched in down-regulated genes in *tfIIfa-1*: they  
196 represent 20.1% of genes down-regulated more than 2 times (13.8% of genes down-regulated  
197 more than 1.5 times), whereas PPR genes account for only 1.4% of total genes in the genome  
198 and 2.5% of expressed genes in our RNA-seq analysis (Figure 3A). Conversely, only 0.8% of  
199 genes up-regulated more than 2 times (1.3% of genes up-regulated more than 1.5 times)  
200 encode PPR genes. PPR proteins are nuclear encoded and targeted to mitochondria or plastids  
201 where they perform post-transcriptional functions. They are classified into two major  
202 subfamilies: P-type PPR proteins are mostly involved in RNA stabilization, splicing and  
203 translation; PLS-type PPR proteins, which are further divided into five subclasses according  
204 to their C-terminus (PLS, E1, E2, E+ and DYW subgroups), are primarily involved in RNA  
205 editing in organelles. Remarkably, PLS-type PPR genes were strongly over-represented

206 among PPR genes that are constitutively down-regulated in *tfII $\alpha$ -1* (79.2% of repressed PPR  
207 genes, or 122 out of 154 genes down-regulated more than 1.5 times) (Figure 3B and  
208 Supplemental Table 2), whereas P-type PPR genes were mainly up-regulated (80% of induced  
209 PPR gene, or 8 out of 10 genes up-regulated more than 1.5 times) (Figure 3B and  
210 Supplemental Table 2), showing that *tfII $\alpha$ -1* mutation mostly affected the expression of PPR  
211 genes involved in RNA editing. However, we also noticed that genes located in a 1.5 Mb  
212 region of chromosome IV, from the T-DNA insertion site in *TFIIF $\alpha$*  to the first exon of  
213 *At4g15610*, were down-regulated in *tfII $\alpha$ -1* (Supplemental Figure 2A). This region contains  
214 411 genes that were all down-regulated except *At4g14690* (*ELIP2*) (Supplemental Figure 2B).  
215 As the repressed region precisely follows the T-DNA locus, the T-DNA insertion his likely to  
216 be responsible for the translocation of the 1.5 Mb region elsewhere in the *tfII $\alpha$ -1* genome,  
217 resulting in a global down-regulation. This translocation hypothesis was further supported by  
218 DNA-sequencing of the *tfII $\alpha$ -1* genome (Supplemental Figure 2C) that also revealed the loss  
219 of an approx. 900 bp-long region containing exons 9 and 10 and the 3' end of exon 8  
220 (Supplemental Figure 2D). Because of this chromosomal rearrangement in *tfII $\alpha$ -1*, we  
221 investigated PPR gene expression in the three other *tfII $\alpha$*  mutants and their complemented  
222 lines by RT-qPCR. Five PPR genes were chosen on the basis of their high down-regulation  
223 (*At1g03510*, *At2g36980*, and *At5g47460*) or up-regulation (*At1g47580* also called *DYW1*, and  
224 *At2g35130*) in *tfII $\alpha$ -1* (Supplemental Table 2). In agreement with RNA-seq data in *tfII $\alpha$ -1*,  
225 *At1g03510*, *At2g36980*, and *At5g47460* were repressed whereas *DYW1* and *At2g35130* were  
226 induced in *tfII $\alpha$ -2* and *tfII $\alpha$ -3* mutants (Figure 3C), though to a lesser extent in the less severe  
227 mutant *tfII $\alpha$ -3*. In contrast, PPR gene expression levels in *tfII $\alpha$ -4* and the complemented lines  
228 were very similar to those observed in wild-type plants (Figure 3C).

229 We further confirmed globally the PPR gene deregulation by RNA-seq analysis of the *tfII $\alpha$ -2*  
230 mutant, whose phenotype is similar to *tfII $\alpha$ -1*. Among PPR genes which are down- and up-  
231 regulated more than 1.5 times in *tfII $\alpha$ -1*, we observed the same tendency in *tfII $\alpha$ -2* (Figure  
232 3D and Supplemental Table 2). In particular, PLS-type PPR genes down-regulated in *tfII $\alpha$ -1*  
233 mutants were also massively down-regulated in *tfII $\alpha$ -2*. As TFIIF $\alpha$  is a protein interactor of  
234 Topo VI, we then asked whether Topo VI might also control the expression of PPR genes, by  
235 assessing the expression of PPR genes in *caa39* and the respective Col-0 wild-type plants.  
236 Surprisingly, PPR genes down-regulated more than 1.5 times in *tfII $\alpha$ -1* are on the contrary  
237 mainly up-regulated in *caa39* (Figure 3E and Supplemental Table 2).



239 **Misexpression of PLS-type PPR genes in *tfII $\alpha$*  mutants results in RNA editing defect in**  
240 **organelles**

241 Because the majority of PPR genes that are deregulated in *tfII $\alpha$ -1* and *tfII $\alpha$ -2* mutants encode  
242 PLS-type PPR proteins involved in C to U editing in chloroplasts and mitochondria, we then  
243 investigated whether PPR gene misexpression could lead to RNA editing defects in the  
244 organelles of *tfII $\alpha$ -2* plants. Total RNA-seq analysis detected 693 and 271 edited sites in  
245 mitochondrial and plastid RNAs, respectively (Supplemental Dataset 1). Among these, 93  
246 sites (80 mitochondrial and 13 plastid target cytosines; rate 0.05, p-value < 0.05) showed  
247 significantly different editing levels between *tfII $\alpha$ -2* and wild-type (Supplemental Dataset 1).  
248 However, because the majority of these sites are edited by unknown PPR proteins, it was not  
249 possible to associate editing defects with PPR deregulation in a global manner. Instead, we  
250 examined individual sites that are edited by known PLS-PPR proteins and whose gene  
251 expression is affected in *tfII $\alpha$ -1* and *tfII $\alpha$ -2*. Among the PLS-PPR genes that were  
252 deregulated in *tfII $\alpha$*  mutants, 28 encoded PLS-PPR proteins with known targets, of which 26  
253 were repressed both in *tfII $\alpha$ .1* and *tfII $\alpha$ .2* (Table 1). Most of the cytosines targeted by those  
254 28 PLS-PPR were not differently edited between *tfII $\alpha$ -2* and wild-type Col-0 (Table 1),  
255 suggesting that the partial repression of those PLS-PPR genes in *tfII $\alpha$ -2* was not sufficient to  
256 reduce the editing of their targets. However, the editing of the well characterized *rpoA* site  
257 78691, which was significantly reduced in *tfII $\alpha$ -2* (89.7% of edition in wild-type, 77.4% in  
258 *tfII $\alpha$ -2*, p-value = 0.00025, Table 1), was correlated with the reduced expression level of  
259 *CLB19* whose protein is required for *rpoA* 78691 editing (Chateigner-Boutin et al., 2008).  
260 Interestingly, two other sites that required the PLS-PPR protein CLB19 for their editing, *clpP*  
261 69642 and *ycf3* 43350 (Chateigner-Boutin et al., 2008), were also less efficiently edited in  
262 *tfII $\alpha$ -2*; however, their reduced editing was not significant in our RNA-seq analysis (Table 1).  
263 Therefore, to confirm these editing defects we used Sanger sequencing on wild-type Col-0,  
264 *tfII $\alpha$ -2* and *tfII $\alpha$ -4* mutants, as well as wild-type Col-3 and *tfII $\alpha$ -1*. First of all, we  
265 confirmed, in independent RT-qPCR experiments, the down-regulation of *CLB19* in *tfII $\alpha$ -2*,  
266 whereas *CLB19* expression in *tfII $\alpha$ -4* was similar to wild-type (Figure 4A). This analysis  
267 confirmed the markedly reduced editing of *rpoA* 78691 in *tfII $\alpha$ -2* and *tfII $\alpha$ -1*, but not in  
268 *tfII $\alpha$ -4* (Figure 4B and Supplemental Figure 3A). This indicates that the editing defect was  
269 genetically linked to TFII $\alpha$  mutations that disrupt both CTD-phosphatase interaction  
270 domains and which lead to the down-regulation of *CLB19*. The second CTD-phosphatase  
271 interaction domain that is missing in *tfII $\alpha$ -4* is dispensable for this function. Sanger

272 sequencing also confirmed the reduced editing of *clpP* 69942 in *tfII $\alpha$ -2* and *tfII $\alpha$ -1*  
273 (Supplemental Figure 3A and 3B). *ycf3* 43350 editing levels were too low to allow the  
274 validation of editing differences by Sanger sequencing (Supplemental Figure 3A and 3B).

275 In addition to the three target sites of CLB19, another editing site drew our attention as the  
276 editing difference was the highest between *tfII $\alpha$ -2* and Col-0: editing of *ndhD* (117166)  
277 increased from 46.5% in wild-type to 64.7% in the mutant, even though this difference was  
278 not very significant in our RNA-seq statistical analysis (Table 1). However, Sanger  
279 sequencing clearly confirmed this increased editing level in *tfII $\alpha$ -1* and *tfII $\alpha$ -2* mutants  
280 (Figure 4B and Supplemental Figure 3A). The gene encoding the PPR protein DYW1 that  
281 edits this site (Kotera et al., 2005) was one of the two PPR genes that instead of being down-  
282 regulated was up-regulated in *tfII $\alpha$ -1* and *tfII $\alpha$ -2* (Figure 3C and Table 1). In addition to site  
283 117166 that is processed by DYW1, *ndhD* is also edited at sites 116785, 116494, 116290 and  
284 116281 by CRR21, OTP85, CRR28, and CRR22 PPR proteins, respectively (Okuda et al.,  
285 2007; Hammani et al., 2009; Okuda et al., 2009). Unlike *DYW1*, the expression of *CRR21*,  
286 *OTP85*, *CRR28*, and *CRR22* PPR genes was not markedly affected in *tfII $\alpha$ -2* (Supplemental  
287 Table 2). According to RNA-seq analysis, their target cytosines were also not differently  
288 edited in *tfII $\alpha$*  mutants, which was further confirmed by Sanger sequencing (Figure 4B and  
289 Supplemental Figure 3A). These results support the idea that the increased editing of *ndhD*  
290 (117166) site is a direct consequence of the increased expression of *DYW1* in *tfII $\alpha$*  mutants.

291

## 292 ***rpoA* editing defect in *tfII $\alpha$* mutants does not impair PEP function**

293 Editing of *rpoA* (78691) causes the modification of Ser67 to the conserved hydrophobic  
294 Phe67 residue, the function of which remains unknown (Figure 4C). Knowing that RpoA,  
295 together with RpoB, RpoC1 and RpoC2, is a core subunit of the plastid-encoded RNA  
296 polymerase (PEP) (Yu et al., 2014), we then asked whether the reduced *rpoA* (78691) editing  
297 in *tfII $\alpha$ -1* and *tfII $\alpha$ -2* mutants might affect PEP function and hence plastid transcription.  
298 Therefore, we specifically analyzed plastid gene expression in *tfII $\alpha$ -2* and wild-type Col-0 in  
299 our RNA-seq experiment. In a previous report, the requirement of CLB19 for efficient plastid  
300 expression was demonstrated by analysing the null mutant *clb19-1* and its complemented line  
301 *clb19-1c* (Chateigner-Boutin et al., 2008). *clb19-1* shows widespread deregulation of plastid  
302 gene expression (Figure 5). On the contrary, the plastid gene expression profile in *tfII $\alpha$ -2* was

303 very similar to the wild-type in spite of the down-regulation of *CLB19* in this mutant (Figure  
304 5 and Supplemental Table 3). Consequently, *CLB19* down-regulation in *tfIIfa* mutants does  
305 not seem to be sufficient to affect PEP function.

306

307 ***tfIIfa* mutation affects the function of the chloroplast NADH dehydrogenase-like (NDH)**  
308 **protein complex at multiple levels**

309 Because editing of *ndhD* (117166) is essential for the introduction of a START codon (Figure  
310 4C), the increased editing efficiency observed in *tfIIfa-2* could be assumed to increase the  
311 production of NdhD peptide in this mutant. NdhD is a subunit of the NDH complex involved  
312 in cyclic electron flow with PSI (Munekage et al., 2004). The NDH complex is made up of  
313 several subunits that are encoded by the nuclear and plastid genomes. Thus, higher levels of  
314 NdhD alone are unlikely to be sufficient to enhance NDH activity in *tfIIfa-2*. Therefore, we  
315 examined the expression of other NDH subunits in *tfIIfa-2*. As shown in Figure 6A, almost all  
316 nuclear and plastid genes that encode NDH subunits were up-regulated in *tfIIfa-2*. We also  
317 analyzed NDH nuclear gene expression in *tfIIfa-1* and *caa39* mutant. These NDH genes were  
318 mostly up-regulated in both *tfIIfa-1* and *tfIIfa-2* mutants whereas all genes are massively  
319 down-regulated in *caa39* (Figure 6B). These results further highlight the genetic link between  
320 TFIIF $\alpha$  and Topo VI and the opposite control they exert over PPR proteins and cellular  
321 processes whose regulation implicates PPR proteins. They also show that TFIIF $\alpha$  might  
322 regulate NDH at multiple levels: firstly, at the transcript level, where TFIIF $\alpha$  participates in  
323 the coordination of the expression of subunits encoded by the nuclear and plastid genomes;  
324 and secondly at the post-transcriptional/translation level by enhancing NdhD protein  
325 production via DYW1 regulation.

326 To test whether the increase in NdhD editing and *NDH* gene up-regulation lead to increased  
327 NDH activity, we measured NDH activity in *tfIIfa-1*, *tfIIfa-2* and *tfIIfa-4* leaves respective to  
328 their wild-type ecotype, as well as in *ndhO* and *trxM4* mutants as known negative and positive  
329 controls for NDH activity (Courteille et al., 2013). NDH activity can be measured *in vivo* as a  
330 distinctive transient increase in chlorophyll fluorescence that occurs when actinic light (AL)  
331 exposition is suddenly stopped (Shikanai et al., 1998). Here, the fluorescence rise was more  
332 pronounced in the three *tfIIfa* mutants as well as in wild-type plants than in the negative  
333 control *ndhO* (Figure 6C and Supplemental Figure 4A & B). However, we noticed a different

334 fluorescence induction kinetics for *tfII $\alpha$ -1* and *tfII $\alpha$ -2*: although the transient increase was  
335 not as long as in the positive control *trxm4*, the slope of the curve during the first 15 sec was  
336 steeper than in the wild-type Col-3 and Col-0, respectively (Figure 6D and Supplemental  
337 Figures 4C). In contrast, the slope value of *tfII $\alpha$ -4* and *trxm4* was similar to the wild-type and  
338 close to 0 in *ndhO*. Consequently, NDH activity seems to be affected in the *tfII $\alpha$*  mutant,  
339 even though it does not correspond to a tremendous increase of NDH activity as can be  
340 observed in the *trxm4* mutant.

341

## 342 **DISCUSSION**

343 Besides its role in endoreduplication, the plant Topoisomerase VI has been implicated in  
344 transcriptional silencing (Kirik et al., 2007) and gene expression control, notably during the  
345 response of plants to stresses and phytohormones (Yin et al., 2002; Jain et al., 2008; Mittal et  
346 al., 2014; Jain et al., 2006). For instance, the constitutive expression of the rice Topo VIA or  
347 Topo VIB subunits enhanced the expression of stress-responsive genes and conferred abiotic  
348 stress tolerance to transgenic Arabidopsis plants (Jain et al. 2006). Topo VI has also been  
349 proposed to be a key regulatory factor of oxidative stress-responsive genes and eventually of  
350 the plant responses to adverse environmental conditions (Šimková et al, 2012). However,  
351 whether this control of gene expression is a direct consequence of the participation of Topo  
352 VI in the process of transcription, notably by solving topological problems associated with  
353 transcription elongation, is unclear. Here, we showed by yeast two hybrid assay and BiFC in  
354 *N. benthamiana* leaves that the Arabidopsis Topo VI complex is associated with the general  
355 transcription factor TFIIF, via the interaction of its BIN4 subunit with the alpha subunit of  
356 TFIIF. Recent experiments on the *tfII $\beta$ 1* mutant revealed plant growth inhibition and  
357 development defects in meristematic organization responsible for stem fasciation and  
358 inflorescence impairments (Babiychuk et al., 2016). We also observed growth inhibition in  
359 *tfII $\alpha$*  mutants but no such developmental perturbations. Thanks to four different allelic  
360 mutants, we show the essential role of the first CTD-phosphatase interaction domain, whereas  
361 the second CTD-phosphatase interaction domain, which is missing in *tfII $\alpha$ -4*, seemed to be  
362 dispensable for TFIIF $\alpha$  function.

363 RNA-seq analysis performed in two different allelic mutants, *tfII $\alpha$ -1* and *tfII $\alpha$ -2*, showed that  
364 TFIIF $\alpha$  defects preferentially affected the expression of PPR genes, and particularly led to the

365 repression of the PLS subfamily involved in RNA editing in mitochondria and plastids. In  
366 contrast, we observed an opposite regulation in the Topo VIA mutant *caa39* in which the PPR  
367 genes down-regulated in *tfII $\alpha$*  mutants are mainly up-regulated. Thus, Topo VI appears as a  
368 transcriptional repressor of PLS-type PPR genes in contrast to TFIIF $\alpha$ . A similar  
369 transcriptional repression by topoisomerases has been reported for the human Topoisomerase  
370 I (Topo I) that can interact with the general transcription factor TFIID (Merino et al., 1993).  
371 TFIID interaction with Topo I was proposed to block the transcriptional machinery at  
372 initiation step and prevent gene expression. Upon transcriptional activator, Topo I and TFIID  
373 would dissociate, release the transcription initiation complex and finally allow transcription  
374 elongation. In our context, as PPR genes are repressed in *tfII $\alpha$ -1* and *tfII $\alpha$ -2* mutants, we can  
375 suppose that TFIIF $\alpha$  is required for PLS-type PPR gene expression by recognizing PPR  
376 promoters and recruiting the transcriptional machinery. Topo VI would act as a transcriptional  
377 repressor by interacting with TFIIF $\alpha$  and physically blocking the transcription of PLS-type  
378 PPR genes. Additional experiments will be required to confirm this model and unveil whether  
379 gene expression control by the Topo VI-TFIIF interaction is directly associated with Pol II.  
380 Indeed, even in far better characterized models such as human cells, genome-wide analyses of  
381 TFIIF-binding sites have revealed that only 20% of them co-localize with Pol II, supporting a  
382 paradigm in which TFIIF may play other roles besides being an accessory protein for Pol II  
383 dependent transcription (Gelev et al., 2014).

384 At first glance consistent with the extensive repression of PLS-type PPR genes in *tfII $\alpha$ -1* and  
385 *tfII $\alpha$ -2*, we observed a broad, but partial, disruption of RNA editing in *tfII $\alpha$ -2*. Global editing  
386 deficiencies have been reported previously in mutant plants unable to produce the PPR-  
387 associated proteins MORF/RIP. Members of the MORF/RIP protein family are required for  
388 efficient editing of probably all targeted cytosines in both organelles. Among these,  
389 MORF8/RIP1 is the major editing factor as 75% and 20% of mitochondrial and plastid sites,  
390 respectively, are affected in *rip1* mutant with an editing defect reaching up to 81% (Bentolila  
391 et al., 2013). In *tfII $\alpha$ -1* and *tfII $\alpha$ -2* mutants, RNA-seq data showed that none of the  
392 *MORF/RIP* genes are down-regulated, but on the contrary some of them are induced in *tfII $\alpha$ -*  
393 *1* and *tfII $\alpha$ -2* such as *MORF3/RIP3*, *MORF4/RIP4*, *MORF5/RIP5* and *MORF6/RIP6*.  
394 Expression of the main factor *MORF8/RIP1* is not affected by the *tfII $\alpha$*  mutation, suggesting  
395 that editing defect observed in *tfII $\alpha$ -1* and *tfII $\alpha$ -2* cannot be attributed to *MORF/RIP*  
396 deregulation, but instead is a consequence of the control of PPR gene expression by TFIIF $\alpha$ .

397 Knocking out PLS-type PPR genes often has drastic effects on target RNA editing sites. For  
398 instance, the editing of cytosines in *rpl16* (25407), *cob* (60520) and *nad4* (167617), which are  
399 targeted by MEF35 and fully edited in wild-type plants, is completely lost in the *mef35-1* K-  
400 O mutant (Brehme et al., 2015). In contrast, the more than two fold down-regulation of  
401 *MEF35* gene in *tfII $\alpha$ -2* had no effect on the editing of these sites. The down-regulation, but  
402 not complete repression, of a single PLS-PPR gene appears to be generally not sufficient to  
403 disturb the editing efficiency in *tfII $\alpha$ -2*. However, one repressed PLS-PPR gene, *CLB19*, was  
404 an exception. CLB19 is required for editing *rpoA* at codon 67 (changing Ser to Phe), which  
405 encodes one of the core subunits of the plastid-encoded polymerase (PEP). Although we did  
406 observe a decreased efficiency of *rpoA* (78691) editing in *tfII $\alpha$ -2*, we did not detect any  
407 resulting deregulation of plastid gene expression in *tfII $\alpha$ -2*. The decreased efficiency of *rpoA*  
408 editing is probably not sufficient to impair the PEP activity. Plant chloroplasts possess a  
409 second RNA polymerase, the nucleus-encoded polymerase (NEP). NEP is mostly active in  
410 young tissues whereas the PEP activity increases with plastid maturation (Yu et al., 2014;  
411 Liere et al., 2011). However, the vast majority of plastids genes can be transcribed by either  
412 PEP or NEP, therefore we cannot exclude that NEP can compensate for the partial PEP defect  
413 in the *tfII $\alpha$*  mutant under the conditions tested.

414 Whereas the broad down-regulation of PLS-type PPR genes only exceptionally led to a  
415 significant reduction of target site editing in *tfII $\alpha$ -2*, the most striking editing alteration was  
416 of the increased editing efficiency that affected *ndhD*. *NdhD* is edited at the genomic position  
417 117166 thanks to DYW1 interacting with the CRR4 PPR protein (Boussardon et al., 2012).  
418 RNA-seq data from *tfII $\alpha$ -1* and *tfII $\alpha$ -2* revealed the concomitant up-regulation of *DYW1* and  
419 *CRR4*, although this was not statistically significant for the latter gene. This editing process is  
420 essential for *NdhD* translation because it allows the start codon formation. Interestingly,  
421 almost all transcripts encoding NDH subunits accumulated in *tfII $\alpha$ -1* and *tfII $\alpha$ -2*, whereas  
422 they were massively down-regulated in *caa39*. These results revealed a multileveled control  
423 of NDH by TFII $\alpha$ : at the transcript level, TFII $\alpha$  participates to coordinate the expression of  
424 subunits encoded by the nuclear and plastid genomes; at the translation level, TFII $\alpha$   
425 participates in *NdhD* protein production via *DYW1* regulation. Consequently, the chlorophyll  
426 fluorescence transient increase that is attributed to NDH activity was slightly more  
427 pronounced in *tfII $\alpha$ -1* and *tfII $\alpha$ -2* than in wild-type plants. Interestingly, in *Synechocystis*  
428 cells exposed to high light stress, the slope of the chlorophyll fluorescence also increases with  
429 light intensity, and it was concluded that NDH activity is induced by high light (Chen et al.,

430 2016). Regarding the very moderate difference between *tfII $\alpha$*  and wild-type chlorophyll  
431 fluorescence patterns, as compared to in *trxm4* and *ndhO* mutants, it remains difficult,  
432 however, to firmly conclude on a clear increase of NDH activity in *tfII $\alpha$*  mutants.

433 The *tfII $\alpha$ -1* and *tfII $\alpha$ -2* allelic mutants represent a very rare case of PPR gene deregulation  
434 which translates into an editing defect in a target RNA. They also highlight an anterograde  
435 signalling pathway in Arabidopsis: the association between Topo VI and the general  
436 transcription factor TFIIF in nucleus controls the expression of nuclear encoded PPR proteins  
437 that are involved in cytoplasmic RNA editing for proper organelle function. However, the  
438 discovery of the molecular mechanisms that allow TFIIF to specifically regulate the  
439 expression of PLS-type PPR genes needs further investigation. Further research is also  
440 required to understand the significance of this regulation, under the opposite control of  
441 TFIIF $\alpha$  and Topo VI, in response to changing and adverse environmental conditions.

442

443

## 444 **METHODS**

### 445 **Cloning and plasmids**

446 Genes were amplified by PCR and cloned into the pDONR207 vector by Gateway BP  
447 reaction and subcloned into a destination vector by Gateway LR reaction (ThermoFisher  
448 Scientific). The destination vectors were pMDC99 for the complementation analysis (*TFIIIF $\alpha$*   
449 gene), pBIFP2 (nYFP) and pBIFP3 (cYFP) for the BiFC experiment (*TFIIIF $\alpha$*  and *BIN4*  
450 genes, respectively), and pEarleyGate102 (CFP) for the subcellular localization (*TopoVIA*  
451 gene) (Curtis and Grossniklaus, 2003; Azimzadeh et al., 2008; Earley et al., 2006). For the  
452 transiently expression in *N. benthamiana*, the p19 plasmid was simultaneously used with the  
453 other constructs.

454

### 455 **Yeast Two-Hybrid Screen and Assay**

456 The yeast two-hybrid screen was performed by Hybrigenics using the Arabidopsis RP1  
457 library. The full-length *BIN4* cDNA (*AT5G24630.3/4*) was used as bait. The yeast two-hybrid  
458 assays were performed using Full-length cDNAs of RHL1/HYP7, AtSPO11-3/RHL2/BIN5  
459 and AtTOP6B/RHL3/HYP6/BIN3 were previously cloned into pLexA (DNA-binding  
460 domain) and pB42AD (activator domain fusion) vectors of the Matchmaker LexA two-hybrid  
461 system (Clontech) (Sugimoto-Shirasu et al., 2005). The *BIN4* full-length cDNA was  
462 amplified by PCR with primers 5'-  
463 TTGCGGCAATTGAGCAGCAGCTCTAGAGAGGGATC-3' and 5'-  
464 GCTCGAGCCTTTCTTGGCTTTTGGC-3', excised with MfeI and XhoI, and cloned into the  
465 EcoRI and XhoI sites of pLexA and pB42AD vectors. Positive interactions were detected by  
466 induction of the lacZ reporter gene in yeast EGY48 cells that are pre-transformed with p8op-  
467 lacZ reporter plasmids.

468

### 469 **Subcellular localization and BiFC**

470 The cDNA of *TopoVIA* and *BIN4* were amplified without their stop codon while the gDNA of  
471 *TFIIIF $\alpha$*  was amplified without the start codon using primers described in Supplemental Table  
472 4. They are subsequently cloned by Gateway reactions. After transformation by  
473 electroporation and selection, C58C1 *Agrobacterium tumefaciens* was inoculated on LB  
474 medium with rifampicin and gentamycin 50  $\mu$ g/mL each (and if necessary kanamycin or



475 spectinomycin 50  $\mu\text{g}/\text{mL}$ ) and incubated at 28°C with 200 rpm. Cells were pelleted by  
476 centrifugation (4000 rpm, 7 min), suspended in infiltration buffer (10 mM  $\text{MgCl}_2$ , 10 mM  
477 MES, pH 5.6, 200  $\mu\text{M}$  acetosyringone) such as  $\text{OD}_{600}$  was 1.0, and incubated at room  
478 temperature for 4 h. Equal volumes of the *A. tumefaciens* suspensions containing interest gene  
479 and p19 plasmid were mixed and infiltrated into 5-week-old *Nicotiana benthamiana* leaves.  
480 Tobacco leaves were observed 4 d after transformation by epi-fluorescence microscopy  
481 (AxioImager Z1 Apotome, Zeiss) allowing the detection of CFP (BP 436/20 nm excitation,  
482 FT 455 nm, BP 480/40 nm emission), YFP (BP 500/25 nm excitation, FT 515 nm, BP 535/30  
483 nm emission) and brightfield.

484

### 485 **Plant material, growth conditions and phenotypic characterization**

486 Ecotypes Col-0 and Col-3 were used in this study. T-DNA insertion mutants were obtained  
487 from NASC Stock Center. The position of the T-DNA insertion was determined by  
488 sequencing PCR products obtained with a gene-specific and a T-DNA left border-specific  
489 primers. With respect to the start codon, T-DNA insertions map at +1922 bp in *tfII $\alpha$ -1*  
490 (SAIL\_1171\_F02), +2479 bp in *tfII $\alpha$ -2* (SALKseq\_038203), +2352 bp in *tfII $\alpha$ -3*  
491 (SALKseq\_123141), and +2820 bp in *tfII $\alpha$ -4* (SALKseq\_095102), respectively. Plant  
492 genotypes were confirmed by PCR using primers described in Supplemental Table 4. For  
493 complemented lines, the *TFII $\alpha$*  gene with its native promoter and terminator was amplified  
494 by PCR on genomic Arabidopsis Col-0 DNA and cloned by Gateway reactions. The clone  
495 was introduced into *tfII $\alpha$ -1*, *tfII $\alpha$ -2*, *tfII $\alpha$ -3* and *tfII $\alpha$ -4* homozygous mutant plants. The  
496 *ndhO* and *trxm4* mutants were provided by Dominique Rumeau (Courteille et al., 2013).

497 *Arabidopsis thaliana* plants were grown 6 weeks on soil in a phytotron under 16 h light / 8 h  
498 dark photoperiod (80-90  $\mu\text{mol photons m}^{-2} \text{ s}^{-1}$ ) and controlled conditions of temperature  
499 (22/20°C, day/night) and relative air humidity (55/75%, day/night). For *in vitro* culture, seeds  
500 were sterilized with bleach, vernalized at 4°C for 3 days and grown on Murashige and Skoog  
501 1/2 media containing 1% sucrose. Plates were placed in growth chambers under 16 h light / 8  
502 h dark photoperiod (80  $\mu\text{mol photons m}^{-2} \text{ s}^{-1}$ ) at 22/20°C (day/night). Seedlings were  
503 collected after 6 d growth.

504

### 505 **Chlorophyll Fluorescence Analysis**

506 NDH activity was detected by chlorophyll fluorescence measurements with a DUAL-PAM-  
507 100 (DUAL-PAM/F, Walz). A mature leaf was dark-acclimated for 20 min and the transient

508 increase in chlorophyll fluorescence was monitored as previously described (Shikanai et al.,  
509 1998). Leaves were exposed to Actinic Light (AL) ( $250 \mu\text{mol photons m}^{-2} \text{s}^{-1}$ ) for 5 min. AL  
510 was turned off and the subsequent transient rise in fluorescence ascribed to NDH activity was  
511 monitored by chlorophyll fluorimetry.

512

### 513 **RNA extraction**

514 RNA extraction was performed from one hundred 6-day-old seedlings for each biological  
515 replicate. For expression and editing analysis, the total RNA was extracted using TRI Reagent  
516 (MRC) and treated with DNase I ( $1 \text{ U}/\mu\text{L}$ ; Thermo Scientific) for 30 min at  $37^\circ\text{C}$  according to  
517 the manufacturer' instructions. For RNA-sequencing, total RNA was extracted according to a  
518 published protocol (Box et al., 2011). Extracted RNA was purified with RNeasy Plant Mini  
519 kit (Qiagen) and treated with DNase I as described above.

520

### 521 **RT-qPCR and Editing Analysis**

522 cDNA was synthesized from 500 ng of total RNA using PrimeScript RT Reagent kit (Perfect  
523 Real Time; Takara) with oligodT and random hexamers for quantitative RT-PCR (RT-qPCR)  
524 experiments, and with random hexamers only for RNA editing analysis.

525 RT-qPCR was performed using SYBR Premix Ex Taq II (Tli RNase H Plus, Takara) using a  
526 CFX96 Real-Time System (CFX Manager; BioRad). Each reaction was prepared using  $0.5 \mu\text{L}$   
527 of cDNA ( $25 \text{ ng}/\mu\text{L}$ ),  $7.5 \mu\text{L}$  of SYBR Green Master mix, and  $5 \mu\text{M}$  forward and reverse  
528 primer each, in a total volume of  $15 \mu\text{L}$ . The amplification profile consisted of  $95^\circ\text{C}$  for 30  
529 sec and 45 cycles ( $95^\circ\text{C}$  for 10 s,  $60^\circ\text{C}$  for 30 s, and  $72^\circ\text{C}$  for 30 s). *PP2A* and *PRF1* were  
530 taken as housekeeping genes to normalize the expression of gene of interest.

531 For editing analysis, cDNA was amplified by PCR before purification using NucleoSpin Gel  
532 and PCR Clean-up (Macherey-Nagel). Purified cDNAs were sequenced by GATC Biotech  
533 (Sanger sequencing SUPREMERUN) using specific primers. Chromatograms were analyzed  
534 with DNA Baser software. Primers used for in RT-qPCR, PCR amplification, and DNA  
535 sequencing were listed in Supplemental Table 4.

536

### 537 **RNA-seq library preparations and sequencing**

538 Three independent biological replicates were produced for each line. For each biological  
539 repetition, RNA samples were obtained by pooling RNA from more than 100 plants. Aerial

540 parts were collected from plants at 1.00 developmental growth stages (Boyes et al., 2001),  
541 cultivated as described above. Total RNA was extracted using RNeasy kit (Qiagen®, Hilden,  
542 Germany) according to the supplier's instructions.

543 For *tfII $\alpha$ -1*, *caa39* (and the respective Col-3 and Col-0 wild-type) gene expression analysis,  
544 RNA-seq experiment was carried out at platform POPS, transcriptOmic Platform of the  
545 Institute of Plant Sciences - Paris-Saclay, using a IG-CNS Illumina Hiseq2000 to perform  
546 paired-end 100bp sequencing, on RNA-seq libraries constructed with the  
547 TruSeq\_Stranded\_mRNA\_SamplePrep\_Guide\_15031047\_D protocol (Illumina®, California,  
548 U.S.A.). The RNA-seq samples were sequenced in paired-end (PE) with a sizing of 260 bp  
549 and a read length of 100 bases. Six samples by lane of Hiseq2000 using individual bar-coded  
550 adapters and giving approximately 30 million of PE reads by sample were generated.

551 For *tfII $\alpha$ -2* and Col-0 wild-type gene expression and editome analyses, RNA-seq libraries  
552 were generated using TruSeq® Stranded Total RNA (with RiboZero plant) #RS-122-2401  
553 (composed by ref 15032611 / batch 20167353; ref 15032612 / batch 20172414; ref 15032615  
554 / batch 20172978; ref 15035748 / batch 20142725) according to the supplier's instructions  
555 RS-122-9007DOC (Illumina®, California, U.S.A.). Using a NextSeq® 500/550 High Output  
556 kit v2 (75 cycles) #FC-404-2005 (composed by ref 15057934 / batch 20157769; ref 15058251  
557 / batch 20166120; ref 15057941 / batch 20158908; ref 1506573 / batch 20169394) and  
558 according to the supplier's instructions 15048776 v02 (Illumina®, California, U.S.A.), the  
559 RNA-seq samples were sequenced in single-end (SE) with a sizing of 260 bp and a read  
560 length of 75 bases. 8 samples by lane of NextSeq500 using individual bar-coded adapters and  
561 giving approximately 40 million of SE reads by sample were generated.

562

### 563 **RNA-seq bioinformatic treatment and analysis**

564 To facilitate comparisons, each RNA-Seq sample followed the same pipeline from trimming  
565 to transcript abundance quantification as follows. Read preprocessing criteria included  
566 trimming of library adapters and performing quality control checks using FastQC (Version  
567 0.11.5) (Andrews, 2010). The raw data (fastq) were trimmed for Phred Quality Score > 20,  
568 read length > 30 bases and sort by Trimming Modified homemade fastx\_toolkit-0.0.13.2  
569 software for rRNA sequences. Bowtie2 (version 2.2.9) (Langmead and Salzberg, 2012) was  
570 used to align reads against the *Arabidopsis thaliana* transcriptome  
571 (TAIR10\_cdna\_20110103\_representative\_gene\_model\_updated) (with --local option). Reads  
572 were counted using a command line modified from Pieterse MJ and al. (Pieterse et al., 2013).

573 Differential expression was performed with SARTools (version 1.5.1) (Varet et al., 2016)  
574 using edgeR with default settings except cpmCutoff which was disabled.  
575 For editing analysis, reads were aligned with STAR (version 2.5.3a) (Dobin et al., 2013)  
576 against the genome (Araport11\_GFF3\_genes\_transposons.201606) with options --  
577 genomeFastaFiles Arabidopsis\_thaliana.TAIR10.31.dna.genome.modified.fa, --runMode  
578 genomeGenerate, --sjdbOverhang 75. Bam files were sorted by coordinates and indexed.  
579 Reads were counted with Htseq-counts (version 0.9.1) and differential expression was  
580 performed with edgeR (version 3.12.1). Editing analysis was made as in (Malbert et al.,  
581 2018).

582

### 583 **DNA-seq analysis of *tfl1fa-1***

584 Genomic DNA from a pool of *tfl1fa-1* plants was extracted and purified using the NucleoSpin  
585 Plant II Maxi kit (Machery-Nagel, Düren, Germany) with PL1 buffer and  
586 polyvinylpolypyrrolidone (PVPP, at half the plant tissue weight). DNA-seq library  
587 preparation and sequencing were performed at the Earlham Institute (Norwich, UK). DNA  
588 libraries were sequenced with 150 bp paired-end run metrics on an Illumina HiSeq4000  
589 Sequencing System. After checking quality with FASTQC (0.11.5), sequences were first  
590 aligned against pCSA110 sequence with bowtie2 (2.2.9). Aligned reads were extracted to a  
591 new bam file which was converted to fastq and fasta format for further use. The fastq format  
592 was used to align those reads against *Arabidopsis thaliana* genome (TAIR 10). Alignment  
593 was visualized in IGV and genes with flanking plasmid borders were identified. Finally, the  
594 reads with both Arabidopsis and plasmid sequences were extracted and BLASTn was used to  
595 identify the border (right or left) of the plasmid and the position of the insertion in the  
596 genome.

597

### 598 **Accession Numbers**

599 Sequence data from this article can be found in the Arabidopsis Genome Initiative or  
600 GenBank/EMBL databases under the following accession numbers: *At4g12610* (*TFIIF $\alpha$* ),  
601 *At5g24630* (*BIN4*), *At5g02820* (*AtSPO11-3*), *At3g20780* (*AtTOP6B*), *At1g48380* (*RHL1*),  
602 *At1g03510*, *At2g36980*, *At5g47460*, *At1g47580* (*DYW1*), *At2g35130*, *At1g05750* (*CLB19*),  
603 *AtCg00740* (*rpoA*), *AtCg00670* (*pclpP*), *AtCg00360* (*ycf3*), *AtCg01050* (*ndhD*), *At5g55740*  
604 (*CRR21*), *At2g02980* (*OTP85*), *At1g59720* (*CRR28*), *At1g11290* (*CRR22*). RNA-seq datasets

605 are available at <https://www.ncbi.nlm.nih.gov/geo/query/acc.cgi?acc=GSE103924> (reviewer  
606 token: slchuqakvwwfjsj)

607

## 608 **Supplemental Data**

609 **Supplemental Figure 1.** Characterization of *TFIIF $\alpha$*  lines compared to wild-type (wt) plants.

610 **Supplemental Figure 2.** Chromosomal rearrangement in *tfIIF $\alpha$ -1* mutant.

611 **Supplemental Figure 3.** Effects of *tfIIF $\alpha$*  mutations on editing efficiency.

612 **Supplemental Figure 4.** NDH activity is affected by the *TFIIF $\alpha$*  mutation.

613 **Supplemental Table 1.** Yeast two-hybrid screen using the full-length Arabidopsis BIN4 as a  
614 bait.

615 **Supplemental Table 2.** PPR gene expression.

616 **Supplemental Table 3.** Plastid gene expression from RNA-seq data.

617 **Supplemental Table 4.** Primer list.

618 **Supplemental Dataset 1.** Editing level of organellar RNAs in *tfIIF $\alpha$ -2* compared to wild-type  
619 Col-0.

620

## 621 **ACKNOWLEDGEMENTS**

622 This work was supported by the French National Research Agency (ANR 2010-JCJC-1205-  
623 01 and ANR-14-CE02-0010 to CL). LD was supported by CEA and Région PACA. High-  
624 throughput RNA-sequencing was performed at the POPS platform, supported by the LabEx  
625 Saclay Plant Sciences-SPS (ANR-10-LABX-0040-SPS). We are deeply grateful to Mr.  
626 Michel Terese for his priceless help with bioinformatics analyses. We also want to express  
627 our gratitude to the students who contributed to this work, especially Justine Quillet.  
628 Dominique Rumeau and Stefano Caffarri at BIAM are thanked for technical help and fruitful

629 discussion on chlorophyll fluorescence analysis. We thank Ben Field for critical reading of  
630 the manuscript.

631

## 632 AUTHOR CONTRIBUTIONS

633 L.D., K.S. and C.L. designed the research. L.D., C.V., D.A. and C.B. performed research.  
634 L.S.-T. and C.L. performed and analyzed RNA-seq. E.D. contributed new computational  
635 tools. L.D., C.L. and C.L. analyzed data. L.D. and C.L. wrote the paper with input from all  
636 coauthors.

637

638

## 639 REFERENCES

- 640 **Abbott, K.L., Renfrow, M.B., Chalmers, M.J., Nguyen, B.D., Marshall, A.G., Legault,**  
641 **P., and Omichinski, J.G.** (2005). Enhanced binding of RNAP II CTD phosphatase  
642 FCP1 to RAP74 following CK2 phosphorylation. *Biochemistry* **44**: 2732–2745.
- 643 **Andrews, S.** (2010). FastQC: A quality control tool for high throughput sequence data.  
644 [Http://Www.Bioinformatics.Babraham.Ac.Uk/Projects/Fastqc/](http://www.Bioinformatics.Babraham.Ac.Uk/Projects/Fastqc/)  
645 <http://www.bioinformatics.babraham.ac.uk/projects/>.
- 646 **Archambault, J., Pan, G., Dahmus, G.K., Cartier, M., Marshall, N., Zhang, S., Dahmus,**  
647 **M.E., and Greenblatt, J.** (1998). FCP1, the RAP74-interacting subunit of a human  
648 protein phosphatase that dephosphorylates the carboxyl-terminal domain of RNA  
649 polymerase II. *J. Biol. Chem.* **273**: 27593–27601.
- 650 **Arenas-M., A., Zehrmann, A., Moreno, S., Takenaka, M., and Jordana, X.** (2014). The  
651 pentatricopeptide repeat protein MEF26 participates in RNA editing in mitochondrial  
652 *cox3* and *nad4* transcripts. *Mitochondrion* **19**: 126–134.
- 653 **Azimzadeh, J., Nacry, P., Christodoulidou, A., Drevensek, S., Camilleri, C., Amiour, N.,**  
654 **Parcy, F., Pastuglia, M., and Bouchez, D.** (2008). Arabidopsis TONNEAU1 proteins  
655 are essential for preprophase band formation and interact with centrin. *Plant Cell* **20**:  
656 2146–59.
- 657 **Babiychuk, E., Hoang, K.T., Vandepoele, K., Van De Slijke, E., Geelen, D., De Jaeger,**  
658 **G., Obokata, J., and Kushnir, S.** (2016). The mutation *nrbp1-A325V* in the largest  
659 subunit of RNA polymerase II suppresses compromised growth of Arabidopsis plants  
660 deficient in a function of the general transcription factor IIF. *Plant J.* **89**: 730–745.
- 661 **Bang, W., Kim, S., Ueda, A., Vikram, M., Yun, D., Bressan, R. a., Hasegawa, P.M.,**  
662 **Bahk, J., and Koiwa, H.** (2006). Arabidopsis Carboxyl-Terminal Domain Phosphatase-  
663 Like Isoforms Share Common Catalytic and Interaction Domains But Have Distinct in  
664 Planta Functions. *Plant Physiol.* **142**: 586–594.
- 665 **Baruah, A., Šimková, K., Apel, K., and Laloi, C.** (2009). Arabidopsis mutants reveal  
666 multiple singlet oxygen signaling pathways involved in stress response and development.  
667 *Plant Mol. Biol.* **70**: 547–563.

- 668 **Bentolila, S., Knight, W., and Hanson, M.** (2010). Natural Variation in Arabidopsis Leads  
669 to the Identification of REME1, a Pentatricopeptide Repeat-DYW Protein Controlling  
670 the Editing of Mitochondrial Transcripts. *Plant Physiol.* **154**: 1966–1982.
- 671 **Bentolila, S., Oh, J., Hanson, M.R., and Bukowski, R.** (2013). Comprehensive High-  
672 Resolution Analysis of the Role of an Arabidopsis Gene Family in RNA Editing. *PLoS*  
673 *Genet.* **9**.
- 674 **Boussardon, C., Salone, V., Avon, A., Berthome, R., Hammani, K., Okuda, K., Shikanai,**  
675 **T., Small, I., and Lurin, C.** (2012). Two Interacting Proteins Are Necessary for the  
676 Editing of the NdhD-1 Site in Arabidopsis Plastids. *Plant Cell* **24**: 3684–3694.
- 677 **Box, M.S., Coustham, V., Dean, C., and Mylne, J.S.** (2011). Protocol: A simple phenol-  
678 based method for 96-well extraction of high quality RNA from Arabidopsis. *Plant*  
679 *Methods* **7**: 7.
- 680 **Boyes, D.C., Zayed, A.M., Ascenzi, R., McCaskill, A.J., Hoffman, N.E., Davis, K.R., and**  
681 **Görlach, J.** (2001). Growth stage-based phenotypic analysis of Arabidopsis: a model for  
682 high throughput functional genomics in plants. *Plant Cell* **13**: 1499–510.
- 683 **Brehme, N., Bayer-császár, E., Glass, F., and Takenaka, M.** (2015). The DYW Subgroup  
684 PPR Protein MEF35 Targets RNA Editing Sites in the Mitochondrial *rpl16*, *nad4* and  
685 *cob* mRNAs in Arabidopsis thaliana. *PLoS One*: 1–12.
- 686 **Breuer, C., Stacey, N.J., West, C.E., Zhao, Y., Chory, J., Tsukaya, H., Azumi, Y.,**  
687 **Maxwell, A., Roberts, K., and Sugimoto-Shirasu, K.** (2007). BIN4, a novel  
688 component of the plant DNA topoisomerase VI complex, is required for  
689 endoreduplication in Arabidopsis. *Plant Cell* **19**: 3655–3668.
- 690 **Chateigner-Boutin, A.L., Colas Des Francs-Small, C., Fujii, S., Okuda, K., Tanz, S.K.,**  
691 **and Small, I.** (2013). The e domains of pentatricopeptide repeat proteins from different  
692 organelles are not functionally equivalent for RNA editing. *Plant J.* **74**: 935–945.
- 693 **Chateigner-Boutin, A.L., Des Francs-Small, C.C., Delannoy, E., Kahlau, S., Tanz, S.K.,**  
694 **De Longevialle, A.F., Fujii, S., and Small, I.** (2011). OTP70 is a pentatricopeptide  
695 repeat protein of the e subgroup involved in splicing of the plastid transcript *rpoC1*. *Plant*  
696 *J.* **65**: 532–542.
- 697 **Chateigner-Boutin, A.L., Ramos-Vega, M., Guevara-García, A., Andrés, C., Gutiérrez-**  
698 **Nava, M.D.L.L., Cantero, A., Delannoy, E., Jiménez, L.F., Lurin, C., Small, I., and**  
699 **Leo, P.** (2008). CLB19, a pentatricopeptide repeat protein required for editing of *rpoA*  
700 and *clpP* chloroplast transcripts. *Plant J.* **56**: 590–602.
- 701 **Chen, X., He, Z., Xu, M., Peng, L., and Mi, H.** (2016). NdhV subunit regulates the activity  
702 of type-1 NAD(P)H dehydrogenase under high light conditions in cyanobacterium  
703 *Synechocystis* sp. PCC 6803. *Sci. Rep.* **6**: 1–11.
- 704 **Corbett, K.D., Benedetti, P., and Berger, J.M.** (2007). Holoenzyme assembly and ATP-  
705 mediated conformational dynamics of topoisomerase VI. *Nat. Struct. Mol. Biol.* **14**: 611–  
706 9.
- 707 **Corbett, K.D. and Berger, J.M.** (2003). Emerging Roles for Plant Topoisomerase VI. *Chem.*  
708 *Biol.* **10**: 107–111.
- 709 **Courteille, A., Vesa, S., Sanz-Barrío, R., Cazale, A.-C., Becuwe-Linka, N., Farran, I.,**  
710 **Havaux, M., Rey, P., and Rumeau, D.** (2013). Thioredoxin m4 Controls Photosynthetic  
711 Alternative Electron Pathways in Arabidopsis. *Plant Physiol.* **161**: 508–520.
- 712 **Curtis, M.D. and Grossniklaus, U.** (2003). A Gateway cloning vector set for high-  
713 throughput functional analysis of genes in planta. *Breakthr. Technol.* **133**: 462–469.
- 714 **Dahan, J., Tcherkez, G., Macherel, D., Benamar, A., Belcram, K., Quadrado, M., Arnal,**  
715 **N., and Mireau, H.** (2014). Disruption of the CYTOCHROME C OXIDASE  
716 DEFICIENT1 Gene Leads to Cytochrome c Oxidase Depletion and Reorchestrated  
717 Respiratory Metabolism in Arabidopsis. *Plant Physiol.* **166**: 1788–1802.
- 718 **Dobin, A., Davis, C.A., Schlesinger, F., Drenkow, J., Zaleski, C., Jha, S., Batut, P.,**

- 719 **Chaisson, M., and Gingeras, T.R.** (2013). STAR: Ultrafast universal RNA-seq aligner.  
720 *Bioinformatics* **29**: 15–21.
- 721 **Earley, K.W., Haag, J.R., Pontes, O., Opper, K., Juehne, T., Song, K., and Pikaard, C.S.**  
722 (2006). Gateway-compatible vectors for plant functional genomics and proteomics. *Plant*  
723 *J.* **45**: 616–29.
- 724 **Gadelle, D., Filée, J., Buhler, C., and Forterre, P.** (2003). Phylogenomics of type II DNA  
725 topoisomerases. *Bioessays* **25**: 232–242.
- 726 **Glass, F., Härtel, B., Zehrmann, A., Verbitskiy, D., and Takenaka, M.** (2015). MEF13  
727 requires MORF3 and MORF8 for RNA editing at eight targets in mitochondrial mRNAs  
728 in *Arabidopsis thaliana*. *Mol. Plant* **8**: 1466–1477.
- 729 **Graille, M., Cladière, L., Durand, D., Lecointe, F., Gadelle, D., Quevillon-Cheruel, S.,**  
730 **Vachette, P., Forterre, P., and van Tilbeurgh, H.** (2008). Crystal Structure of an Intact  
731 Type II DNA Topoisomerase: Insights into DNA Transfer Mechanisms. *Structure* **16**:  
732 360–370.
- 733 **Hammani, K., Okuda, K., Tanz, S.K., Chateigner-Boutin, A.-L., Shikanai, T., and Small,**  
734 **I.** (2009). A Study of New *Arabidopsis* Chloroplast RNA Editing Mutants Reveals  
735 General Features of Editing Factors and Their Target Sites. *Plant Cell* **21**: 3686–3699.
- 736 **Hartung, F., Angelis, K.J., Meister, A., Schubert, I., Melzer, M., and Puchta, H.** (2002).  
737 An archaeobacterial topoisomerase homolog not present in other eukaryotes is  
738 indispensable for cell proliferation of plants. *Curr. Biol.* **12**: 1787–1791.
- 739 **Härtel, B., Zehrmann, A., Verbitskiy, D., and Takenaka, M.** (2013). The longest  
740 mitochondrial RNA editing PPR protein MEF12 in *Arabidopsis thaliana* requires the  
741 full-length E domain. *RNA Biol.* **10**: 1337–1342.
- 742 **Hayes, M.L., Giang, K., Berhane, B., and Mulligan, R.M.** (2013). Identification of two  
743 pentatricopeptide repeat genes required for rna editing and zinc binding by c-terminal  
744 cytidine deaminase-like domains. *J. Biol. Chem.* **288**: 36519–36529.
- 745 **Hu, Z. et al.** (2016). Mitochondrial Defects Confer Tolerance against Cellulose Deficiency.  
746 *Plant Cell* **28**: 2276–2290.
- 747 **Jain, M., Tyagi, A.K., and Khurana, J.P.** (2008). Constitutive expression of a meiotic  
748 recombination protein gene homolog, OsTOP6A1, from rice confers abiotic stress  
749 tolerance in transgenic *Arabidopsis* plants. *Plant Cell Rep.* **27**: 767–78.
- 750 **Jain, M., Tyagi, A.K., and Khurana, J.P.** (2006). Overexpression of putative topoisomerase  
751 6 genes from rice confers stress tolerance in transgenic *Arabidopsis* plants. *FEBS J.* **273**:  
752 5245–5260.
- 753 **Kamada, K., Roeder, R.G., and Burley, S.K.** (2003). Molecular mechanism of recruitment  
754 of TFIIF- associating RNA polymerase C-terminal domain phosphatase (FCP1) by  
755 transcription factor IIF. *Proc. Natl. Acad. Sci. U. S. A.* **100**: 2296–2299.
- 756 **Kimura, M., Suzuki, H., and Ishihama, A.** (2002). Formation of a Carboxy-Terminal  
757 Domain Phosphatase (Fcp1)/TFIIF/RNA Polymerase II (pol II) Complex in. *Mol. Cell.*  
758 *Biol.* **22**: 1577–1588.
- 759 **Kirik, V., Schrader, A., Uhrig, J.F., and Hulskamp, M.** (2007). MIDGET unravels  
760 functions of the *Arabidopsis* topoisomerase VI complex in DNA endoreduplication,  
761 chromatin condensation, and transcriptional silencing. *Plant Cell* **19**: 3100–3110.
- 762 **Kotera, E., Tasaka, M., and Shikanai, T.** (2005). A pentatricopeptide repeat protein is  
763 essential for RNA editing in chloroplasts. *Nature* **433**: 326–30.
- 764 **Kumar, S., Showalter, S.A., and Noid, W.G.** (2013). Native-based simulations of the  
765 binding interaction between RAP74 and the disordered FCP1 peptide. *J. Phys. Chem. B*  
766 **117**: 3074–3085.
- 767 **Langmead, B. and Salzberg, S.L.** (2012). Fast gapped-read alignment with Bowtie 2. *Nat*  
768 *Methods* **9**: 357–359.
- 769 **Li, F. et al.** (2014). Article Modulation of RNA Polymerase II Phosphorylation Downstream



- 770 of Pathogen Perception Orchestrates Plant Immunity.: 748–758.
- 771 **Lin, P.S., Dubois, M.F., and Dahmus, M.E.** (2002). TFIIF-associating carboxyl-terminal  
772 domain phosphatase dephosphorylates phosphoserines 2 and 5 of RNA polymerase II. *J.*  
773 *Biol. Chem.* **277**: 45949–45956.
- 774 **Luse, D.S.** (2012). Rethinking the role of TFIIF in transcript initiation by RNA polymerase II.  
775 *Transcription* **3**: 156–159.
- 776 **Malbert, B., Rigaille, G., Brunaud, V., Lurin, C., and Delannoy, E.** (2018). Bioinformatic  
777 Analysis of Chloroplast Gene Expression and RNA Posttranscriptional Maturation  
778 Using RNA Sequencing. *Methods Mol. Biol.* **1829**: 279–294.
- 779 **Maxwell, A., Bush, N.G., and Evans-Roberts, K.** (2015). DNA Topoisomerases. *EcoSal*  
780 *Plus* **6**.
- 781 **Merino, A., Madden, K.R., Lane, W.S., Champoux, J.J., and Reinberg, D.** (1993). DNA  
782 topoisomerase I is involved in both repression and activation of transcription. *Nature*  
783 **365**: 227–232.
- 784 **Mittal, A., Balasubramanian, R., Cao, J., Singh, P., Subramanian, S., Hicks, G.,**  
785 **Nothnagel, E.A., Abidi, N., Janda, J., Galbraith, D.W., and Rock, C.D.** (2014).  
786 TOPOISOMERASE 6B is involved in chromatin remodelling associated with control of  
787 carbon partitioning into secondary metabolites and cell walls, and epidermal  
788 morphogenesis in Arabidopsis. *J. Exp. Bot.* **65**: 4217–4239.
- 789 **Munekage, Y., Hashimoto, M., Miyake, C., Tomizawa, K.I., Endo, T., Tasaka, M., and**  
790 **Shikanai, T.** (2004). Cyclic electron flow around photosystem I is essential for  
791 photosynthesis. *Nature* **429**: 579–582.
- 792 **Nguyen, B.D., Abbott, K.L., Potempa, K., Kobor, M.S., Archambault, J., Greenblatt, J.,**  
793 **Legault, P., and Omichinski, J.G.** (2003). NMR structure of a complex containing the  
794 TFIIF subunit RAP74 and the RNA polymerase II carboxyl-terminal domain  
795 phosphatase FCP1. *Proc. Natl. Acad. Sci. U. S. A.* **100**: 5688–5693.
- 796 **O'Malley, R.C., Barragan, C.C., and Ecker, J.R.** (2015). A user's guide to the Arabidopsis  
797 T-DNA insertion mutant collections. *Methods Mol. Biol.* **1284**: 323–42.
- 798 **Okuda, K., Hammani, K., Tanz, S.K., Peng, L., Fukao, Y., Myouga, F., Motohashi, R.,**  
799 **Shinozaki, K., Small, I., and Shikanai, T.** (2010). The pentatricopeptide repeat protein  
800 OTP82 is required for RNA editing of plastid *ndhB* and *ndhG* transcripts. *Plant J.* **61**:  
801 339–349.
- 802 **Okuda, K., Chateigner-Boutin, A.-L., Nakamura, T., Delannoy, E., Sugita, M., Myouga,**  
803 **F., Motohashi, R., Shinozaki, K., Small, I., and Shikanai, T.** (2009). Pentatricopeptide  
804 Repeat Proteins with the DYW Motif Have Distinct Molecular Functions in RNA  
805 Editing and RNA Cleavage in Arabidopsis Chloroplasts. *Plant Cell Online* **21**: 146–156.
- 806 **Okuda, K., Myouga, F., Motohashi, R., Shinozaki, K., and Shikanai, T.** (2007).  
807 Conserved domain structure of pentatricopeptide repeat proteins involved in chloroplast  
808 RNA editing. *104*: 6–10.
- 809 **Palancade, B., Dubois, M., and Bensaude, O.** (2002). FCP1 Phosphorylation by Casein  
810 Kinase 2 Enhances Binding to TFIIF and RNA Polymerase II Carboxyl-terminal Domain  
811 FCP1 Phosphorylation by Casein Kinase 2 Enhances Binding to TFIIF and RNA  
812 Polymerase II Carboxyl-terminal D. *J. Biol. Chem.* **277**: 36061–67.
- 813 **Pieterse, M.J., Verk, M.C. Van, Hickman, R., and Wees, S.C.M. Van** (2013). RNA-Seq :  
814 revelation of the messengers. *Trends Plant Sci.* **18**: 175–179.
- 815 **Schrader, A., Welter, B., Hulskamp, M., Hoecker, U., and Uhrig, J.F.** (2013). MIDGET  
816 connects COP1-dependent development with endoreduplication in Arabidopsis thaliana.  
817 *Plant J.* **1**: 67–79.
- 818 **Shikanai, T., Endo, T., Hashimoto, T., Yamada, Y., Asada, K., and Yokota, A.** (1998).  
819 Directed disruption of the tobacco *ndhB* gene impairs cyclic electron flow around  
820 photosystem I. *Proc. Natl. Acad. Sci.* **95**: 9705–9709.

- 821 **Sosso, D., Mbelo, S., Vernoud, V., Gendrot, G., Dedieu, A., Chambrier, P., Dauzat, M.,**  
822 **Heurtevin, L., Guyon, V., Takenaka, M., and Rogowsky, P.M.** (2012). PPR2263, a  
823 DYW-Subgroup Pentatricopeptide Repeat Protein, Is Required for Mitochondrial nad5  
824 and cob Transcript Editing, Mitochondrion Biogenesis, and Maize Growth. *Plant Cell*  
825 *Online* **24**: 676–691.
- 826 **Sugimoto-Shirasu, K., Roberts, G.R., Stacey, N.J., McCann, M.C., Maxwell, A., and**  
827 **Roberts, K.** (2005). RHL1 is an essential component of the plant DNA topoisomerase  
828 VI complex and is required for ploidy-dependent cell growth. *Proc. Natl. Acad. Sci. U.*  
829 *S. A.* **102**: 18736–18741.
- 830 **Sugimoto-Shirasu, K., Stacey, N.J., Corsar, J., Roberts, K., and McCann, M.C.** (2002).  
831 DNA topoisomerase VI is essential for endoreduplication in Arabidopsis. *Curr. Biol.* **12**:  
832 1782–1786.
- 833 **Takenaka, M., Verbitskiy, D., Zehrmann, A., and Brennicke, A.** (2010). Reverse genetic  
834 screening identifies five E-class PPR proteins involved in RNA editing in mitochondria  
835 of Arabidopsis thaliana. *J. Biol. Chem.* **285**: 27122–27129.
- 836 **Tang, J., Kobayashi, K., Suzuki, M., Matsumoto, S., and Muranaka, T.** (2010). The  
837 mitochondrial PPR protein lovastatin insensitive 1 plays regulatory roles in cytosolic and  
838 plastidial isoprenoid biosynthesis through RNA editing. *Plant J.* **61**: 456–466.
- 839 **Varet, H., Brillet-Guéguen, L., Coppée, J.Y., and Dillies, M.A.** (2016). SARTools: A  
840 DESeq2- and edgeR-based R pipeline for comprehensive differential analysis of RNA-  
841 Seq data. *PLoS One* **11**: 1–8.
- 842 **Verbitskiy, D., Härtel, B., Zehrmann, A., Brennicke, A., and Takenaka, M.** (2011). The  
843 DYW-E-PPR protein MEF14 is required for RNA editing at site matR-1895 in  
844 mitochondria of Arabidopsis thaliana. *FEBS Lett.* **585**: 700–704.
- 845 **Verbitskiy, D., Merwe, J.A. Van Der, Zehrmann, A., Härtel, B., and Takenaka, M.**  
846 (2012). The E-class PPR protein MEF3 of Arabidopsis thaliana can also function in  
847 mitochondrial RNA editing with an additional DYW domain. *Plant Cell Physiol.* **53**:  
848 358–367.
- 849 **Wagoner, J.A., Sun, T., Lin, L., and Hanson, M.R.** (2015). Cytidine deaminase motifs  
850 within the DYW domain of two pentatricopeptide repeat-containing proteins are required  
851 for site-specific chloroplast RNA editing. *J. Biol. Chem.* **290**: 2957–2968.
- 852 **Weissenberger, S., Soll, J., and Carrie, C.** (2017). The PPR protein SLOW GROWTH 4 is  
853 involved in editing of nad4 and affects the splicing of nad2 intron 1. *Plant Mol. Biol.* **93**:  
854 355–368.
- 855 **Woodson, J.D. and Chory, J.** (2008). Coordination of gene expression between organellar  
856 and nuclear genomes. *Nat Rev Genet* **9**: 383–395.
- 857 **Xie, T., Chen, D., Wu, J., Huang, X., Wang, Y., Tang, K., Li, J., Sun, M., and Peng, X.**  
858 (2016). Growing Slowly 1 locus encodes a PLS-type PPR protein required for RNA  
859 editing and plant development in Arabidopsis. *J. Exp. Bot.* **67**: 5687–5698.
- 860 **Yagi, Y., Tachikawa, M., Noguchi, H., Satoh, S., Obokata, J., and Nakamura, T.** (2013).  
861 Pentatricopeptide repeat proteins involved in plant organellar RNA editing. *RNA Biol.*  
862 **10**: 1419–1425.
- 863 **Yang, A., Abbott, K.L., Desjardins, A., Lello, D., Omichinski, J.G., and Legault, P.**  
864 (2009). Article NMR Structure of a Complex Formed by the Carboxyl-Terminal Domain  
865 of Human RAP74 and a Phosphorylated Peptide from the Central Domain of the FCP1  
866 Phosphatase NMR Structure of a Complex Formed by the Carboxyl-Terminal Domain of  
867 Human RAP74 and a Ph. *Biochemistry* **48**: 1964–1974.
- 868 **Yin, Y., Cheong, H., Friedrichsen, D., Zhao, Y., Hu, J., Mora-Garcia, S., and Chory, J.**  
869 (2002). A crucial role for the putative Arabidopsis topoisomerase VI in plant growth and  
870 development. *Proc. Natl. Acad. Sci. U. S. A.* **99**: 10191–10196.
- 871 **Yuan, H. and Liu, D.** (2012). Functional disruption of the pentatricopeptide protein SLG1

872 affects mitochondrial RNA editing, plant development, and responses to abiotic stresses  
873 in Arabidopsis. *Plant J.* **70**: 432–444.  
874 **Zehrmann, A., Van Der Merwe, J.A., Verbitskiy, D., Härtel, B., Brennicke, A., and**  
875 **Takenaka, M.** (2012). The DYW-class PPR protein MEF7 is required for RNA editing  
876 at four sites in mitochondria of *Arabidopsis thaliana*. *RNA Biol.* **9**: 156–162.  
877 **Zhu, Q. et al.** (2012). SLO2, a mitochondrial pentatricopeptide repeat protein affecting  
878 several RNA editing sites, is required for energy metabolism. *Plant J.* **71**: 836–849.  
879  
880

**A**

|           |                | AD fusion |      |                |       |       |      |
|-----------|----------------|-----------|------|----------------|-------|-------|------|
|           |                | pB42      | BIN4 | TFIIF $\alpha$ | TOP6A | TOP6B | RHL1 |
| BD fusion | pLexA          | -         | -    | -              | -     | -     | -    |
|           | BIN4           | -         | +    | (+)            | +     | -     | +    |
|           | TFIIF $\alpha$ | -         | +    | n.d.           | -     | -     | -    |
|           | TOP6A          | -         | +    | -              | +     | +     | +    |
|           | TOP6B          | -         | -    | -              | +     | +     | -    |

**B**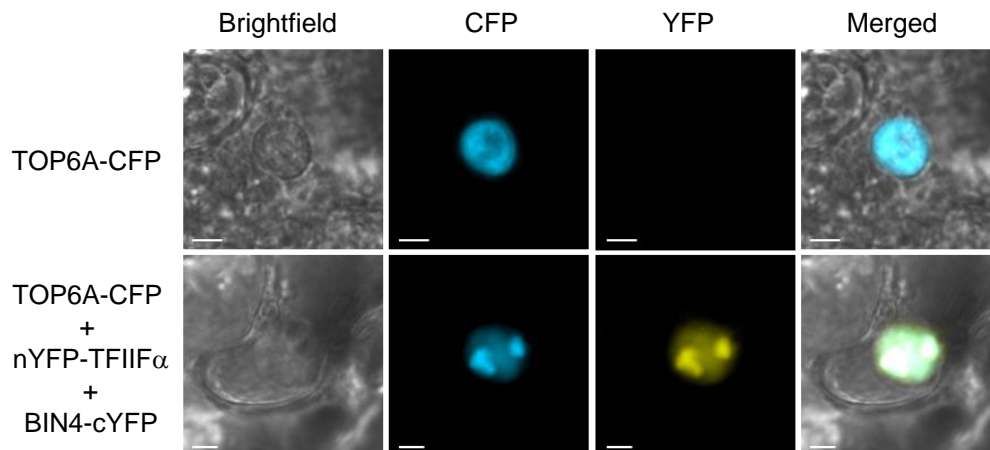

**Figure 1.** Interaction between BIN4 and TFIIF $\alpha$ .

**(A)** Yeast two-hybrid analysis of BIN4, TFIIF $\alpha$ , RHL1, TOP6A and TOP6B protein interactions. The *Arabidopsis thaliana* BIN4, TFIIF $\alpha$ , RHL1, TOP6A and TOP6B genes were cloned into pLexA (BD, binding domain fusion) and pB42 (AD, activator domain fusion) vectors, and their protein interactions were detected by induction (+: strong induction; (+): weak induction) or no induction (-) of the lacZ reporter gene. n.d.: not determined. Grey boxes: data from Breuer *et al.* 2007.

**(B)** Transiently agro-transformed mesophyll cells from *N. benthamiana* leaves expressing different combinations of BiFC constructs and/or TOP6A fused with CFP, as indicated. Scale bars: 2  $\mu$ m.

**A**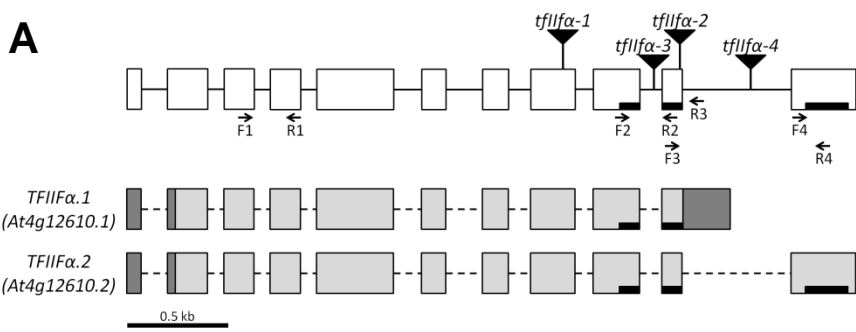**B**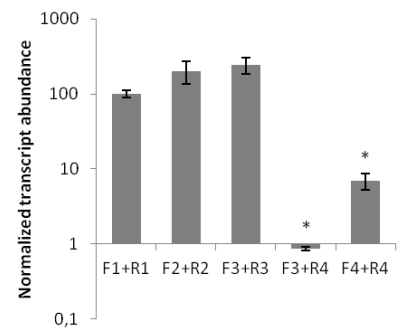**C**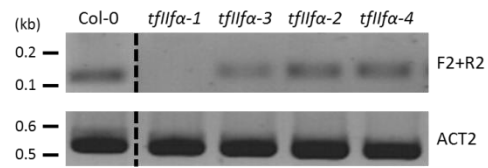**D**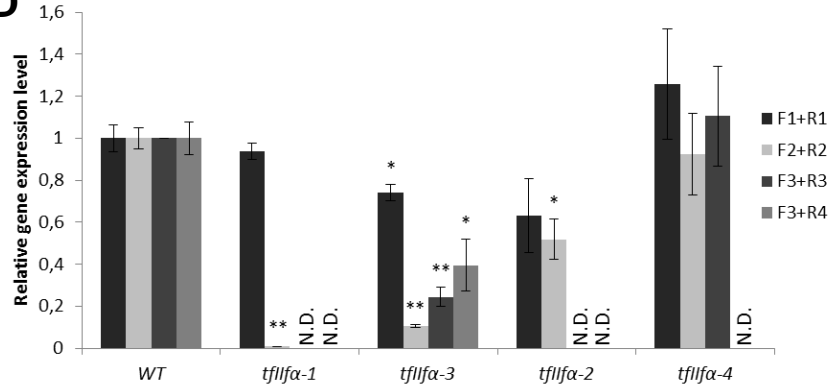**E**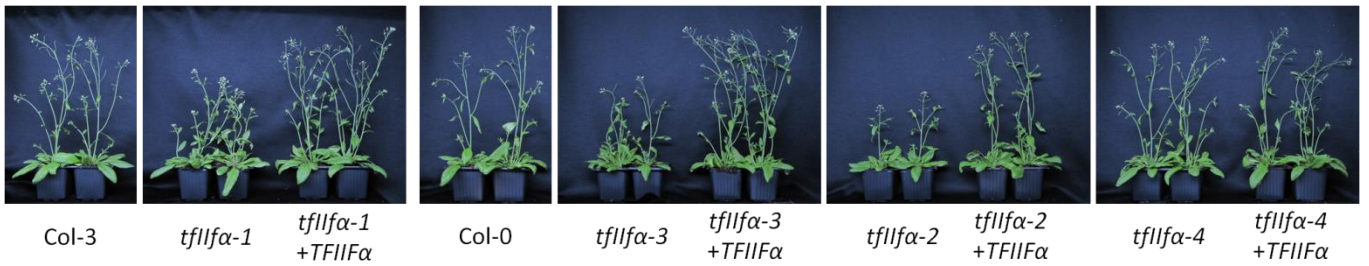

**Figure 2.** Characterization of *tflifa* mutants.

**(A)** Schematic structure of the *TFIIFa* (*At4g12610*) gene and the two major *TFIIFa* transcripts. Boxes and lines represent exons and introns, respectively. 5'-UTR and 3'-UTR in *TFIIFa* transcripts are shown as dark grey boxes. Sequences encoding CTD-phosphatase interaction domains are shown as black bars. Locations of the T-DNA insertions and the primers used for PCR are shown as triangles and arrows, respectively.

**(B)** RT-qPCR-based analysis of *TFIIFa* transcripts in aerial parts of 6-day-old wild-type plants with different primer pairs. Different primer pairs were designed to amplify specifically *TFIIFa*.1 (primer pair F3+R3), *TFIIFa*.2 (primer pairs F3+R4 and F4+R4) or both transcripts (primer pairs F1+R1 and F2+R2). Transcript levels were expressed relative to the levels of transcripts detected with the F1+R1 primer pair. Error bars represent standard deviation from biological triplicates. Significant expression differences between transcripts were estimated with a t-test: \* if p-value < 0.01.

**(C)** RT-PCR-based *TFIIFa* transcript analysis in the four mutants compared to Col-0 wild-type plants. RT-PCR was performed with the F2+R2 primer pair; *ACTIN 2* (*At3g18780*) was used as control.

**(D)** RT-qPCR-based *TFIIFa* transcript level analyses in the four *tflifa* relative to corresponding wild-type plants (Col-3 or Col-0). Error bars represent standard deviation from biological duplicates. Significant expression differences between *tflifa* and wild-type lines were estimated with a t-test: \*\* if p-value < 0.01 and \* if p-value < 0.05. N.D.: not detected.

**(E)** Phenotype of *tflifa* mutants and their complemented lines. According to their ecotype, 40-day-old *tflifa*-1 plants were compared to Col-3 wild-type plants while 38-day-old *tflifa*-2, -3, and -4 lines were compared to Col-0 wild-type plants.

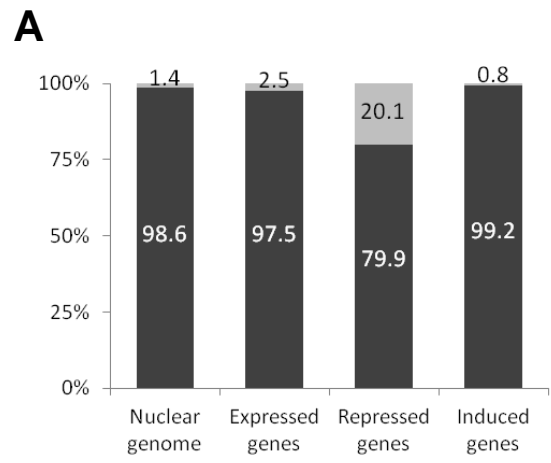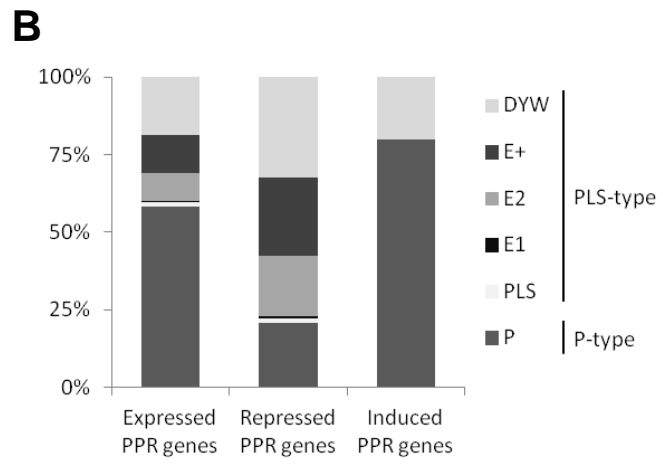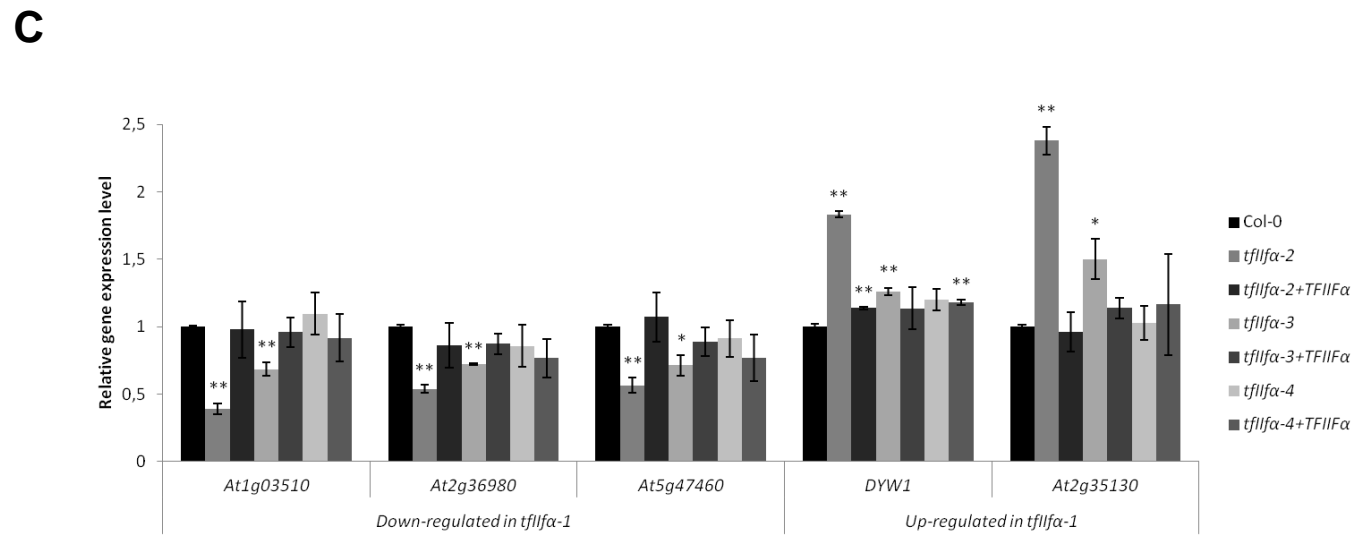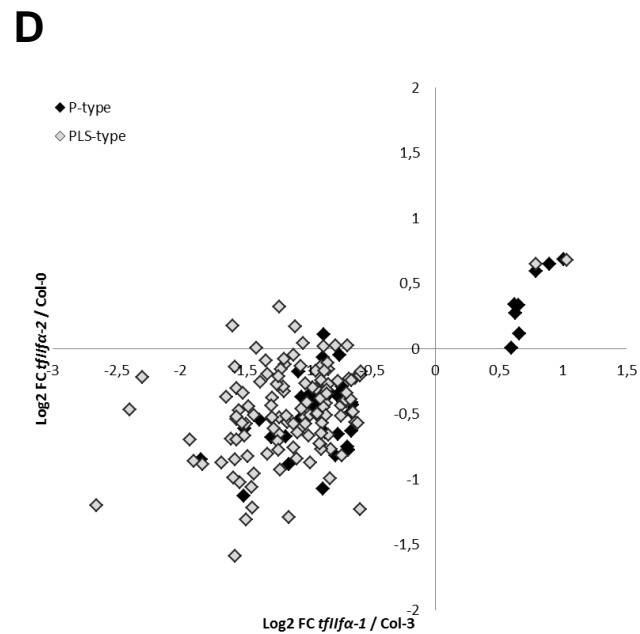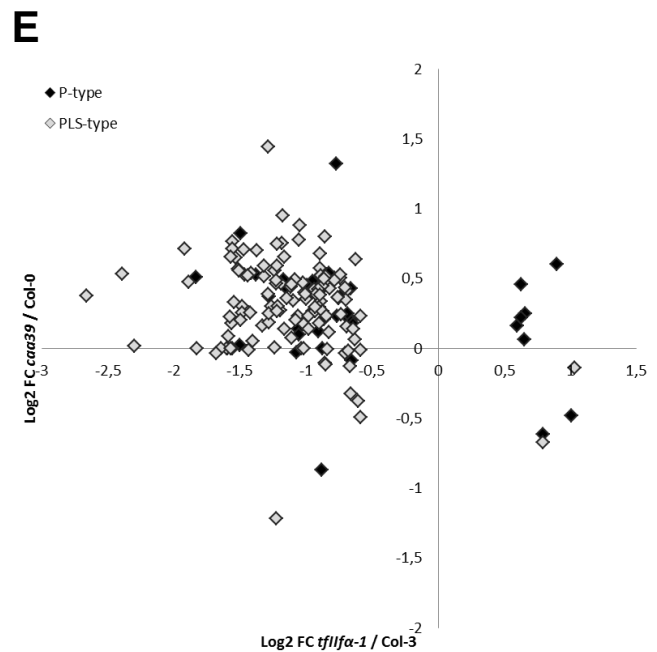

**Figure 3.** TFIIFa and Topo VI exert opposite control over PPR gene expression.

**(A)** Proportion of PPR genes in the Arabidopsis nuclear genome and among expressed, repressed and induced (> 2-fold in RNA-seq, p-value < 0.01) genes in *tfl1fa-1* mutant.

**(B)** Distribution of expressed, repressed and induced (> 1.5-fold in *tfl1fa-1*, p-value < 0.01) PPR genes according to their subgroups.

**(C)** Expression of five representative PPR genes measured by RT-qPCR in *tfl1fa-2*, *tfl1fa-3*, *tfl1fa-4* and their respective complementation lines relative to wild-type Col-0. Error bars represent standard deviation from biological triplicates. Significant expression differences between mutant and wild-type lines were estimated with a *t*-test: \*\* if p-value < 0.01 and \* if p-value < 0.05.

**(D) (E)** Scatter-plot comparative analysis of PPR gene expression in *tfl1fa-1*, *tfl1fa-2* **(D)** and *caa39* **(E)**. PPR genes repressed or induced more than 1.5-fold in *tfl1fa-1* (p-value < 0.01) have been plotted. P- and PLS-type PPR genes are represented by black and grey diamonds, respectively.



**A**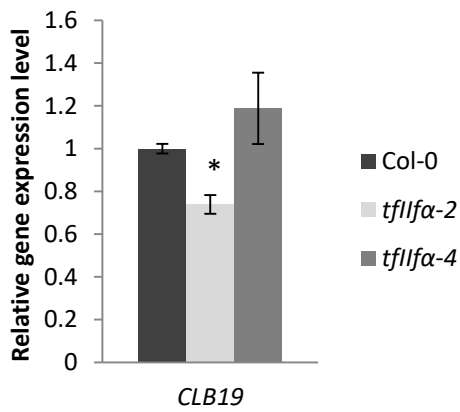**B**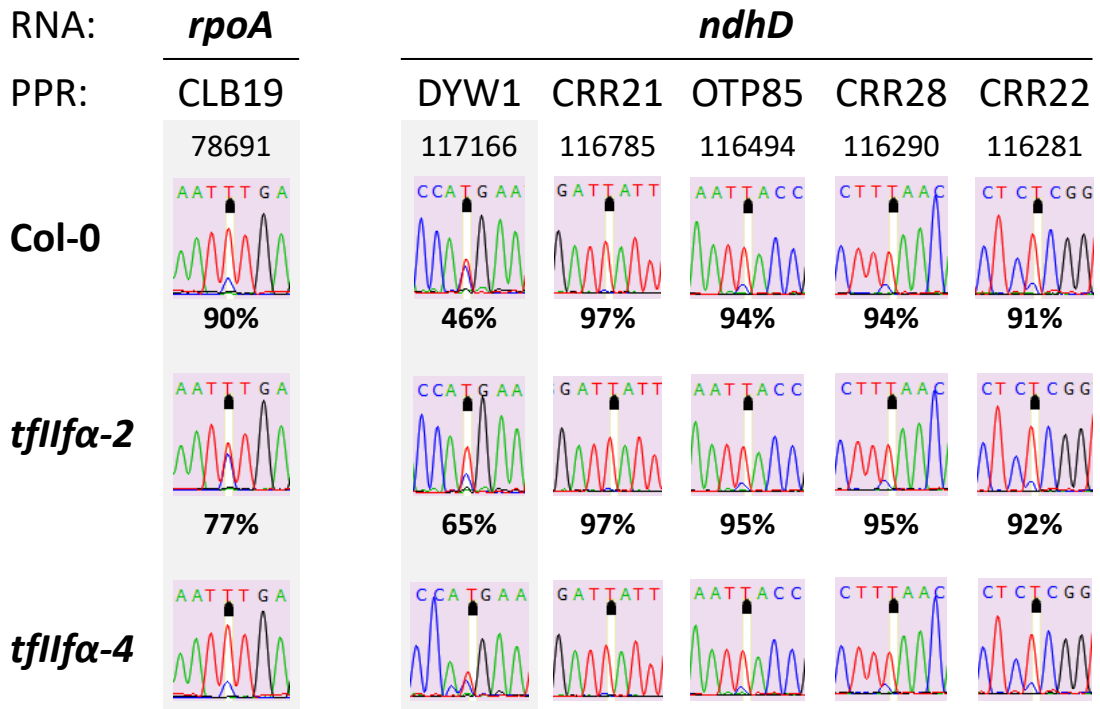**C**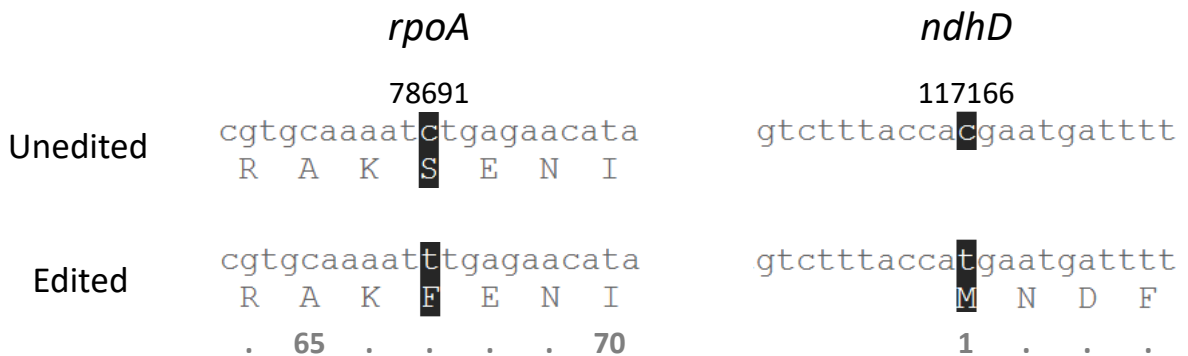

**Figure 4.** The misexpressions of *CLB19* and *DYW1* PPR genes in *tfl1fa-2* mutant are correlated with editing level impairment in *rpoA* and *ndhD* RNA.

**(A)** Expression of PPR gene *CLB19* measured by RT-qPCR in *tfl1fa-2* and *tfl1fa-4* relative to wild-type Col-0. Error bars represent standard deviation from biological duplicates. Significant expression difference between *tfl1fa* and wild-type lines were estimated with a t-test : \* if p-value < 0.05.

**(B)** *rpoA* and *ndhD* editing levels measured by Sanger sequencing in wild-type Col-0, *tfl1fa-2*, and *tfl1fa-4*. Chromatograms of *rpoA* (78691) and *ndhD* (117166) edited sites targeted by the *CLB19* and *DYW1* PPR proteins, respectively (grey backdrop). For *ndhD*, editing at the genomic position 117166 is compared with those of four other loci not edited by *DYW1*. Under each chromatogram is indicated the editing percentage detected in RNA-seq.

**(C)** Comparison of nucleic acid and protein sequences of *rpoA* and *ndhD* depending on editing process or not at genomic positions 78691 and 117166, respectively. Numbers under protein sequences refer to amino acid position.

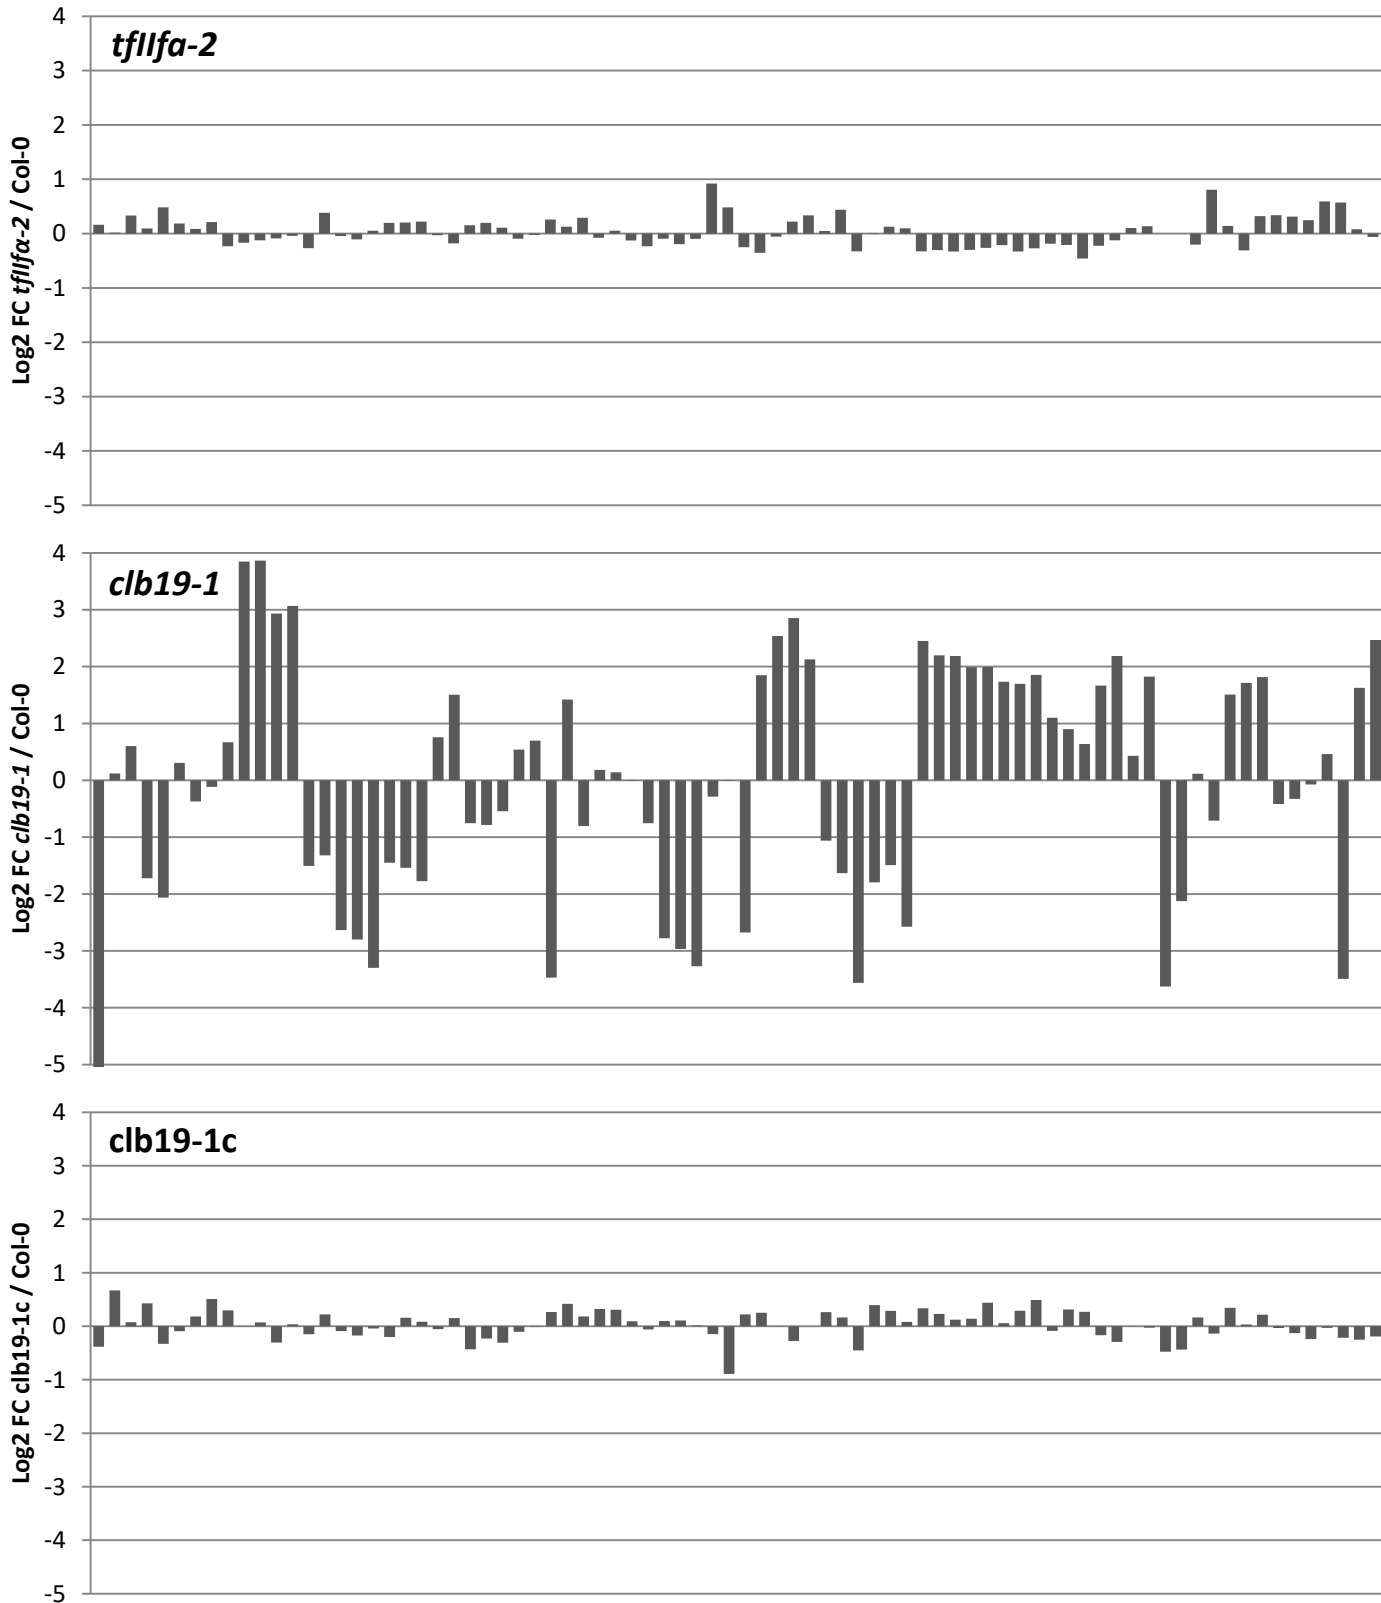

**Figure 5. Plastid gene expression depending on *CLB19* defect.**

Comparison of plastid gene expression between *tfl1fa-2* (*CLB19* repressed), *clb19-1* (KO mutant) and its complemented line *clb19-1c* (displaying wild-type phenotype). RNA-seq data of *clb19-1* and *clb19-1c* were from Chateigner-Boutin *et al.* (2008). Genes are sorted from left to right according to their genomic position on the plastid chromosome (see Table S3 for details).

**A**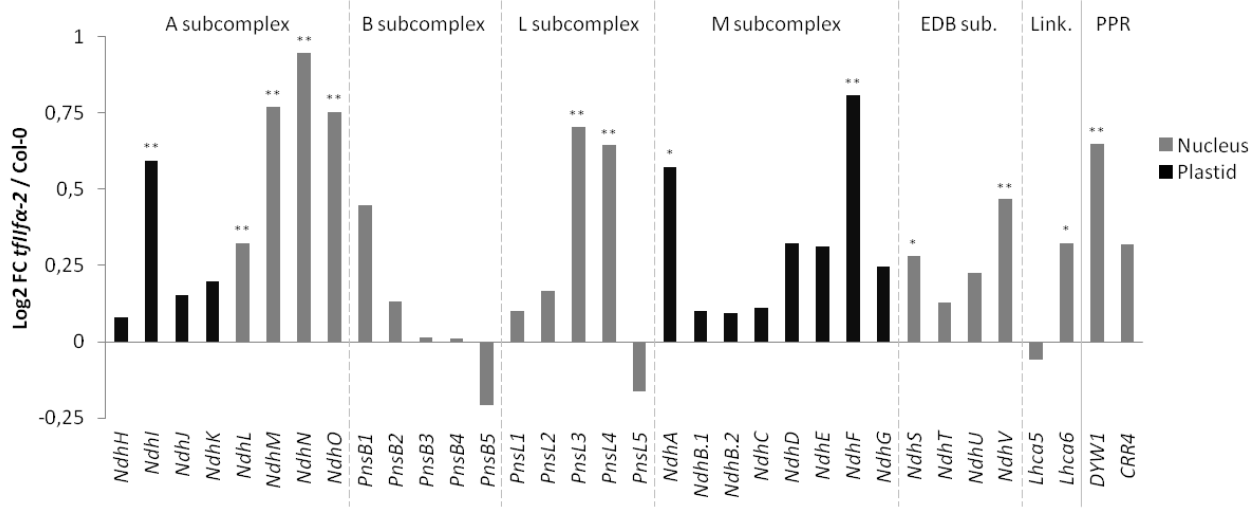**B**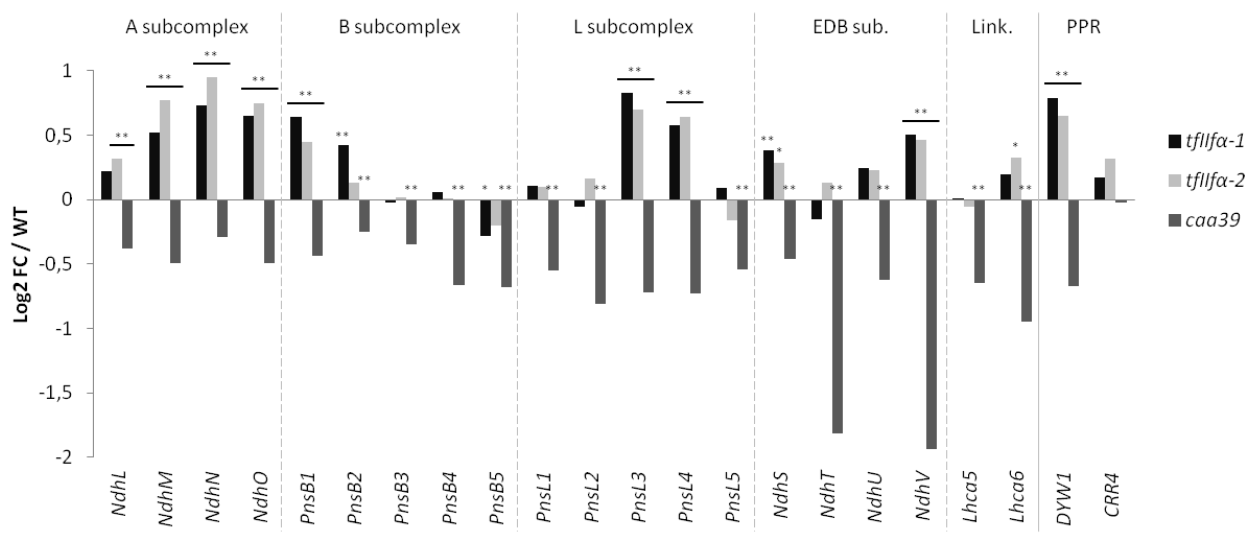**C**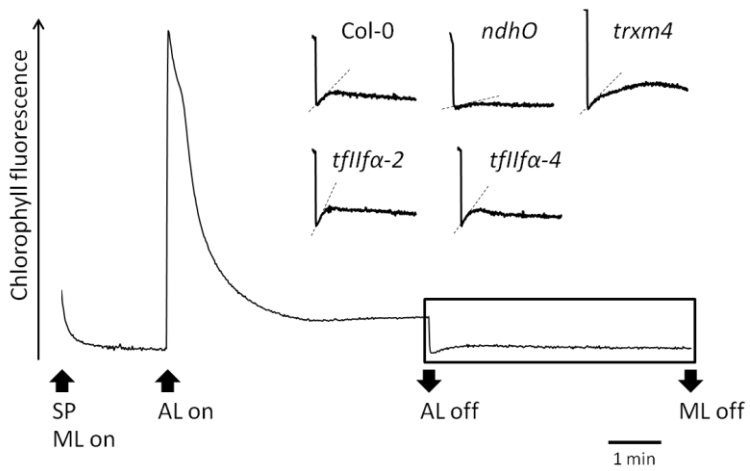**D**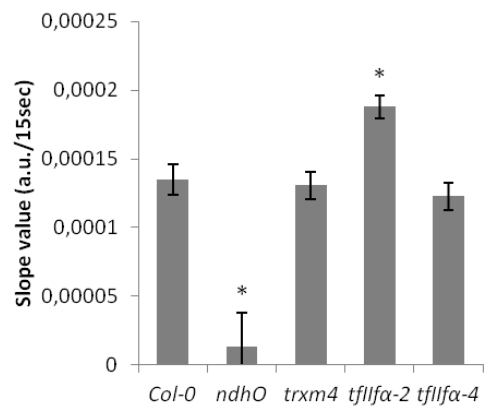

**Figure 6.** NDH expression and activity are affected by the *TFIIFa* mutation.

**(A) (B)** Expression of NDH subunit and PPR genes required for *NDH* transcript editing. **(A)** Expression of nuclear- and plastid-encoded genes in *tfIIfa-2* are expressed relative to wild-type Col-0 **(B)** Expression of nuclear-encoded genes in *tfIIfa-1*, *tfIIfa-2* and *caa39* mutants are expressed relative their wild-type (Col-3 or Col-0). Significant expression differences between a mutant line and the corresponding wild-type are shown: \* if p-value < 0.05 and \*\* if p-value < 0.01. EDB: electron donor-binding; Link.: linkers.

**(C)** Analysis of NDH activity by measuring the chlorophyll fluorescence rise after turning off AL. The bottom curve represents a typical trace of chlorophyll fluorescence in wild-type Col-0. Insets are magnified traces from the boxed area. Slope of the curve is indicated by dash line. SP, saturating pulse; ML, measuring light; AL, actinic light.

**(D)** Calculation of the slope of the curve during the first 15 s after AL off. Error bars represent standard deviation from five biological replicates. Significant differences between mutant and wild-type lines were estimated with a *t*-test: \* : if p-value < 0.01.

**Table 1.** Deregulated PLS-type PPR gene expression related to target site editing in *tfl1fa* mutants.

| Gene ID          | Gene Name           | caa39 vs. Col-0 |                | tfl1fa-1 vs. Col-3 |                | tfl1fa-2 vs. Col-0 |                | Target RNA |                    |               | % Editing   |             |              | References                                   |
|------------------|---------------------|-----------------|----------------|--------------------|----------------|--------------------|----------------|------------|--------------------|---------------|-------------|-------------|--------------|----------------------------------------------|
|                  |                     | log2 FC         | p-value        | log2 FC            | p-value        | log2 FC            | p-value        | Mito.      | Plastid            | Locus         | Col-0       | tfl1fa-2    | p-value      |                                              |
| AT5G66520        | <i>CREF7</i>        | -0.14           | 1.1E-01        | 1.03               | 2.9E-13        | 0.68               | 6.2E-06        |            | <i>ndhB</i>        | 95225         | 97.6        | 98.6        | 0.235        | Yagi et al. (2013)                           |
| <b>AT1G47580</b> | <b><i>DYW1</i></b>  | <b>-0.68</b>    | <b>5.2E-12</b> | <b>0.79</b>        | <b>1.6E-09</b> | <b>0.65</b>        | <b>3.8E-06</b> |            | <b><i>ndhD</i></b> | <b>117166</b> | <b>46.5</b> | <b>64.7</b> | <b>0.101</b> | Boussardon et al. (2012)                     |
| AT4G25270        | <i>OTP70</i>        | -0.49           | 2.9E-04        | -0.59              | 3.1E-04        | -1.23              | 1.5E-09        |            | <i>rpoC1</i>       | 21806         | 35.9        | 38.7        | 0.822        | Chateigner-Boutin et al. (2011)              |
| AT4G30700        | <i>MEF29 / DYW9</i> | 0.06            | 7.2E-01        | -0.63              | 3.3E-03        | -0.57              | 2.9E-02        |            | <i>nad5</i>        | 22005         | 96.9        | 97.0        | 0.993        | Sosso et al. (2012)                          |
|                  |                     |                 |                |                    |                |                    |                |            | <i>cob</i>         | 61142         | 98.4        | 98.5        | 0.705        |                                              |
| AT4G37380        | <i>ELI1</i>         | -0.33           | 3.7E-03        | -0.66              | 1.7E-05        | -0.24              | 1.7E-01        |            | <i>ndhB</i>        | 95287         | NA          | NA          | NA           | Hayes et al. (2013)                          |
| AT4G32430        | <i>GRS1</i>         | 0.34            | 7.7E-02        | -0.70              | 1.9E-03        | -0.34              | 2.0E-01        |            | <i>nad6</i>        | 77157         | 98.9        | 98.4        | 0.184        | Xie et al. (2016)                            |
|                  |                     |                 |                |                    |                |                    |                |            | <i>rps4</i>        | 82740         | 83.5        | 83.7        | 0.931        |                                              |
|                  |                     |                 |                |                    |                |                    |                |            | <i>nad4L</i>       | 189177        | 95.4        | 94.9        | 0.512        |                                              |
|                  |                     |                 |                |                    |                |                    |                |            | <i>nad1</i>        | 318126        | 98.7        | 98.8        | 0.905        |                                              |
| AT2G29760        | <i>OTP81 / QED1</i> | 0.50            | 1.4E-06        | -0.74              | 9.9E-05        | -0.44              | 3.6E-02        |            | <i>rps12</i>       | 69553         | 21.9        | 21.6        | 0.491        | Hammani et al. (2009), Wagoner et al. (2015) |
|                  |                     |                 |                |                    |                |                    |                |            | <i>matK</i>        | 2931          | 81.1        | 78.4        | 0.228        |                                              |
|                  |                     |                 |                |                    |                |                    |                |            | <i>rpoB</i>        | 23898         | 89.6        | 88.4        | 0.421        |                                              |
|                  |                     |                 |                |                    |                |                    |                |            | <i>accD</i>        | 58642         | 78.3        | 75.6        | 0.415        |                                              |
|                  |                     |                 |                |                    |                |                    |                |            | <i>ndhB</i>        | 95608         | 87.4        | 89.7        | 0.917        |                                              |
| AT2G35030        | <i>COD1</i>         | 0.49            | 2.5E-03        | -0.84              | 1.1E-04        | -0.16              | 5.4E-01        |            | <i>cox2</i>        | 41931         | 94.6        | 95.0        | 0.848        | Dahan et al. (2014)                          |
|                  |                     |                 |                |                    |                |                    |                |            | <i>cox2</i>        | 42376         | 95.0        | 95.3        | 0.820        |                                              |
|                  |                     |                 |                |                    |                |                    |                |            | <i>nad4</i>        | 167373        | 99.8        | 99.9        | 0.402        |                                              |
| AT1G62260        | <i>MEF9</i>         | 0.80            | 3.5E-05        | -0.86              | 4.2E-05        | -0.51              | 4.6E-02        |            | <i>nad7</i>        | 133233        | 94.1        | 92.8        | 0.543        | Takenaka et al. (2010)                       |
| <b>AT1G05750</b> | <b><i>CLB19</i></b> | <b>0.26</b>     | <b>4.1E-02</b> | <b>-0.88</b>       | <b>1.1E-09</b> | <b>-0.45</b>       | <b>2.3E-02</b> |            | <b><i>rpoA</i></b> | <b>78691</b>  | <b>89.7</b> | <b>77.4</b> | <b>0.000</b> | Chateigner-Boutin et al. (2008)              |
|                  |                     |                 |                |                    |                |                    |                |            | <b><i>clpP</i></b> | <b>69942</b>  | <b>86.7</b> | <b>82.8</b> | <b>0.083</b> |                                              |
|                  |                     |                 |                |                    |                |                    |                |            | <b><i>ycf3</i></b> | <b>43350</b>  | <b>5.9</b>  | <b>3.8</b>  | <b>0.047</b> |                                              |
| AT3G02330        | <i>MEF13</i>        | 0.68            | 6.1E-04        | -0.89              | 3.0E-04        | -0.77              | 7.4E-03        |            | <i>nad7</i>        | 134309        | NA          | NA          | NA           | Glass et al. (2015)                          |
|                  |                     |                 |                |                    |                |                    |                |            | <i>ccmFc</i>       | 53562         | 57.8        | 58.1        | 0.963        |                                              |
|                  |                     |                 |                |                    |                |                    |                |            | <i>ccmFc</i>       | 53197         | 52.5        | 53.5        | 0.931        |                                              |
|                  |                     |                 |                |                    |                |                    |                |            | <i>cox3</i>        | 218593        | 97.7        | 97.7        | 0.896        |                                              |
|                  |                     |                 |                |                    |                |                    |                |            | <i>nad2</i>        | 81239         | 97.0        | 97.0        | 0.806        |                                              |
|                  |                     |                 |                |                    |                |                    |                |            | <i>nad4</i>        | 161850        | NA          | NA          | NA           |                                              |

|           |                 |      |         |       |         |       |         |               |        |      |      |       |                                                 |
|-----------|-----------------|------|---------|-------|---------|-------|---------|---------------|--------|------|------|-------|-------------------------------------------------|
|           |                 |      |         |       |         |       |         | <i>nad5</i>   | 21890  | 11.7 | 14.8 | 0.054 |                                                 |
|           |                 |      |         |       |         |       |         | <i>nad5</i>   | 20665  | 99.4 | 99.3 | 0.623 |                                                 |
| AT2G13600 | SLO2            | 0.18 | 2.6E-01 | -0.90 | 8.6E-06 | -0.39 | 1.2E-01 | <i>mttB</i>   | 157634 | 35.3 | 31.4 | 0.363 | Zhu et al. (2012)                               |
|           |                 |      |         |       |         |       |         | <i>mttB</i>   | 157635 | 81.9 | 82.3 | 0.912 |                                                 |
|           |                 |      |         |       |         |       |         | <i>mttB</i>   | 158156 | 39.6 | 47.9 | 0.111 |                                                 |
|           |                 |      |         |       |         |       |         | <i>nad1</i>   | 147007 | NA   | NA   | NA    |                                                 |
|           |                 |      |         |       |         |       |         | <i>nad4L</i>  | 189122 | 95.0 | 95.6 | 0.856 |                                                 |
|           |                 |      |         |       |         |       |         | <i>nad7</i>   | 135888 | 96.5 | 96.9 | 0.556 |                                                 |
|           |                 |      |         |       |         |       |         | <i>nad1</i>   | 147047 | NA   | NA   | NA    |                                                 |
| AT4G38010 | SLO4            | 0.39 | 1.1E-01 | -0.93 | 4.1E-05 | -0.50 | 1.2E-01 | <i>nad4</i>   | 167277 | 99.2 | 99.1 | 0.590 | Weissenberger et al. (2017)                     |
| AT3G26782 | MEF14           | 0.23 | 1.2E-01 | -0.98 | 6.8E-08 | -0.51 | 4.0E-02 | <i>matR</i>   | 144418 | 94.1 | 93.3 | 0.974 | Verbitskiy et al. (2011)                        |
| AT3G09040 | MEF12           | 0.14 | 4.9E-01 | -0.98 | 1.3E-04 | -0.87 | 2.9E-03 | <i>nad5</i>   | 141796 | 99.2 | 99.3 | 0.695 | Härtel et al. (2013)                            |
| AT3G13880 | OTP72           | 0.35 | 3.6E-02 | -1.00 | 4.5E-07 | -0.67 | 5.4E-03 | <i>rpl16</i>  | 25176  | 96.7 | 97.6 | 0.191 | Chateigner-Boutin et al. (2013)                 |
| AT3G03580 | MEF26           | 0.23 | 1.3E-01 | -1.06 | 1.5E-07 | -0.62 | 1.0E-02 | <i>cox3</i>   | 218590 | 96.9 | 97.0 | 0.819 | Arenas-M et al. (2014)                          |
|           |                 |      |         |       |         |       |         | <i>nad4</i>   | 161858 | NA   | NA   | NA    |                                                 |
| AT1G17630 | CWM1            | 0.20 | 3.4E-01 | -1.08 | 2.6E-05 | -0.64 | 3.9E-02 | <i>ccmB</i>   | 30890  | 93.2 | 93.7 | 0.833 | Hu et al. (2016)                                |
|           |                 |      |         |       |         |       |         | <i>nad5</i>   | 141572 | 99.6 | 99.6 | 0.921 |                                                 |
|           |                 |      |         |       |         |       |         | <i>ccmC</i>   | 240296 | NA   | NA   | NA    |                                                 |
| AT5G19020 | MEF18           | 0.45 | 4.7E-03 | -1.11 | 1.3E-07 | -0.05 | 8.4E-01 | <i>nad4</i>   | 167599 | 99.4 | 99.3 | 0.880 | Takenaka et al. (2010)                          |
| AT3G12770 | MEF22           | 0.07 | 7.4E-01 | -1.11 | 4.8E-09 | -0.58 | 3.5E-02 | <i>nad3</i>   | 260858 | 34.2 | 35.0 | 0.963 | Takenaka et al. (2010)                          |
| AT1G08070 | OTP82           | 0.65 | 1.3E-02 | -1.16 | 7.2E-07 | -0.56 | 5.9E-02 | <i>ndhG</i>   | 118858 | 81.2 | 82.7 | 0.757 | Okuda et al. (2010)                             |
|           |                 |      |         |       |         |       |         | <i>ndhB</i>   | 95644  | 85.2 | 88.2 | 0.829 |                                                 |
| AT5G08490 | SLG1            | 0.14 | 5.7E-01 | -1.17 | 8.3E-06 | -0.52 | 1.3E-01 | <i>nad3</i>   | 260757 | 74.2 | 72.8 | 0.790 | Yuan and Liu (2012)                             |
| AT5G09950 | MEF7            | 0.30 | 2.5E-01 | -1.21 | 2.1E-05 | -0.16 | 6.8E-01 | <i>nad2</i>   | 328667 | NA   | NA   | NA    | Zehrmann et al. (2012)                          |
|           |                 |      |         |       |         |       |         | <i>nad4L</i>  | 189191 | 96.8 | 94.9 | 0.037 |                                                 |
|           |                 |      |         |       |         |       |         | <i>cob</i>    | 60559  | 97.8 | 96.4 | 0.007 |                                                 |
|           |                 |      |         |       |         |       |         | <i>ccb206</i> | 30490  | 87.4 | 85.1 | 0.405 |                                                 |
| AT1G06140 | MEF3            | 0.71 | 9.3E-03 | -1.47 | 1.9E-07 | -0.83 | 4.1E-02 | <i>atp4</i>   | 188574 | 98.8 | 98.4 | 0.268 | Verbitskiy et al. (2012)                        |
| AT2G03880 | REME1           | 0.30 | 2.3E-01 | -1.48 | 3.9E-07 | -0.58 | 7.8E-02 | <i>nad2</i>   | 79760  | NA   | NA   | NA    | Bentolila et al. (2010)                         |
|           |                 |      |         |       |         |       |         | <i>mttB</i>   | 158042 | 5.0  | 10.2 | 0.006 |                                                 |
|           |                 |      |         |       |         |       |         | <i>matR</i>   | 144142 | 89.7 | 89.2 | 0.868 |                                                 |
|           |                 |      |         |       |         |       |         | <i>rpl5</i>   | 57865  | 87.3 | 85.8 | 0.358 |                                                 |
| AT3G11460 | MEF10           | 0.76 | 4.1E-04 | -1.56 | 6.6E-09 | -0.54 | 1.1E-01 | <i>nad2</i>   | 330204 | 97.5 | 96.7 | 0.176 | Härtel et al. (2013)                            |
| AT4G14850 | LOI1 /<br>MEF11 | 0.23 | 1.1E-01 | -1.57 | 6.7E-26 | -0.14 | 5.0E-01 | <i>cox3</i>   | 218701 | 99.0 | 98.5 | 0.078 | Verbitskiy et al. (2010),<br>Tang et al. (2010) |

|                  |              |      |         |       |         |       |         |  |               |        |      |      |       |                      |
|------------------|--------------|------|---------|-------|---------|-------|---------|--|---------------|--------|------|------|-------|----------------------|
|                  |              |      |         |       |         |       |         |  | <i>nad4</i>   | 161816 | NA   | NA   | NA    |                      |
|                  |              |      |         |       |         |       |         |  | <i>ccb203</i> | 257133 | NA   | NA   | NA    |                      |
| <i>AT4G14050</i> | <i>MEF35</i> | 0.37 | 1.9E-02 | -2.66 | 6.4E-19 | -1.20 | 1.3E-03 |  | <i>rpl16</i>  | 25407  | 94.1 | 94.6 | 0.625 | Brehme et al. (2015) |
|                  |              |      |         |       |         |       |         |  | <i>cob</i>    | 60520  | 98.0 | 96.3 | 0.017 |                      |
|                  |              |      |         |       |         |       |         |  | <i>nad4</i>   | 167617 | 97.5 | 96.7 | 0.512 |                      |

log2 FC: log2 Fold Change calculated from three RNA-seq biological replicates for *caa39*, wild-type Col-0 (Col-0), *tfl1fa-1*, wild-type Col-3 (Col-3), *tfl1fa-2*, and a wild-type sister line (Col-0). % Editing: Percentage of editing calculated from three RNA-seq biological replicates for *tfl1fa-2* and a wild-type sister line (Col-0). The statistical treatment of the data is described in Methods.
